1     **Increased association between Epstein-Barr virus EBNA2 from type 2 strains and the**  
2                             **transcriptional repressor BS69 restricts B cell growth**

3

4     Rajesh Ponnusamy<sup>1</sup>, Ritika Khatri<sup>1</sup>, Paulo B. Correia<sup>2</sup>, Erika Mancini<sup>1</sup>, Paul J. Farrell<sup>2</sup> and  
5     Michelle J. West<sup>1\*</sup>

6     1. School of Life Sciences, University of Sussex, Falmer, Brighton, BN1 9QG, UK.

7     2. Section of Virology, Imperial College London, Norfolk Place, London W2 1PG, UK.

8

9     \* To whom correspondence should be addressed. Tel: +44 (0)1273 678404; Fax: +44 (0)1273

10    877586; Email: [m.j.west@sussex.ac.uk](mailto:m.j.west@sussex.ac.uk)

11

12

13 **Abstract**

14 Natural variation separates Epstein-Barr virus (EBV) into type 1 and type 2 strains. Type 2  
15 EBV is less transforming *in vitro* due to sequence differences in the EBV transcription factor  
16 EBNA2. This correlates with reduced activation of the EBV oncogene LMP1 and some cell  
17 genes. Transcriptional activation by type 1 EBNA2 can be suppressed through the binding of  
18 two PXLXP motifs in its transactivation domain (TAD) to the dimeric coiled-coil MYND  
19 domain (CC-MYND) of the BS69 repressor protein (ZMYND11). We identified a third  
20 conserved PXLXP motif in type 2 EBNA2. We found that type 2 EBNA2 peptides containing  
21 this motif bound BS69<sub>CC-MYND</sub> efficiently and that the type 2 EBNA2<sub>TAD</sub> bound an additional  
22 BS69<sub>CC-MYND</sub> molecule. Full-length type 2 EBNA2 also bound BS69 more efficiently in pull-  
23 down assays. Molecular weight analysis and low-resolution structures obtained using small-  
24 angle X-ray scattering showed that three BS69<sub>CC-MYND</sub> dimers bound two molecules of type 2  
25 EBNA2<sub>TAD</sub>, in line with the dimeric state of full-length EBNA2 *in vivo*. Importantly,  
26 mutation of the third BS69 binding motif in type 2 EBNA2 improved B-cell growth  
27 maintenance. Our data indicate that increased association with BS69 restricts growth  
28 promotion by EBNA2 and may contribute to reduced B-cell transformation by type 2 EBV.

29

30

31

32

33

34

35

36 **Author summary**

37 Epstein-Barr virus (EBV) drives the development of many human cancers worldwide  
38 including specific types of lymphoma and carcinoma. EBV infects B lymphocytes and  
39 immortalises them, thus contributing to lymphoma development. The virus promotes B  
40 lymphocyte growth and survival by altering the level at which hundreds of genes are  
41 expressed. The EBV protein EBNA2 is known to activate many growth-promoting genes.  
42 Natural variation in the sequence of EBNA2 defines the two main EBV strains: type 1 and  
43 type 2. Type 2 strains immortalise B lymphocytes less efficiently and activate some growth  
44 genes poorly, although the mechanism of this difference is unclear. We now show that  
45 sequence variation in type 2 EBNA2 creates a third site of interaction for the repressor  
46 protein (BS69, ZMYND11). We have characterised the complex formed between type 2  
47 EBNA2 and BS69 and show that three dimers of BS69 form a bridged complex with two  
48 molecules of type 2 EBNA2. We demonstrate that mutation of the additional BS69  
49 interaction site in type 2 EBNA2 improves its growth-promoting function. Our results  
50 therefore provide a molecular explanation for the different B lymphocyte growth promoting  
51 activities of type 1 and type 2 EBV. This aids our understanding of immortalisation by EBV.

52

53

## 54 **Introduction**

55 Epstein-Barr virus (EBV) is a ubiquitous  $\gamma$ -herpesvirus that immortalises human B  
56 lymphocytes to establish a lifelong persistent infection that is usually harmless. Delayed  
57 primary EBV infection can however give rise to infectious mononucleosis. EBV is also  
58 associated with the development of malignancies that include Burkitt's (BL), Hodgkin's,  
59 diffuse large B cell and post-transplant lymphoma and nasopharyngeal or gastric carcinoma.  
60 EBV expresses nine latent proteins in *in vitro* infected lymphoblastoid cell lines (LCLs),  
61 including 6 Epstein-Barr nuclear antigens (EBNA1, 2, 3A, 3B, 3C and leader protein) and 3  
62 latent membrane proteins (LMP1, 2A, 2B). The EBNA2 transcription factor is one of five of  
63 these latent genes essential for B cell transformation (1). EBNA2 functions as the master  
64 regulator of EBV latent gene transcription and activates numerous cell genes that control B  
65 cell growth and survival (2). It cannot however bind to DNA directly and hijacks cell DNA  
66 binding proteins e.g. RBPJ (RBPJ $\kappa$ , CBF1) and EBF1 to target viral and cell gene regulatory  
67 elements (2, 3). Although EBNA2 binding sites are close to gene promoters in the viral  
68 genome, in the B cell genome they are mostly found at enhancer elements and EBNA2 has  
69 been shown to promote enhancer-promoter interactions (4-6). EBNA2 activates transcription  
70 through interactions between its acidic transactivation domain (TAD) and histone acetyl  
71 transferases, ATP-dependent remodellers and components of the preinitiation complex (7-  
72 13).

73

74 EBV genome sequences worldwide separate into two main strains (type 1 and type 2) based  
75 on differences in the EBNA2 and EBNA3A, 3B and 3C genes (14-18). Type 2 strains are less  
76 efficient at immortalising resting B cells *in vitro* than type 1 strains (19). This phenotype is  
77 determined by sequence variation in EBNA2 since complementation of an EBNA2 defective

78 virus with type 1 EBNA2 but not type 2 EBNA2 supports efficient primary B cell  
79 immortalisation (1). Consistent with its reduced primary B cell transforming function, type 2  
80 EBNA2 cannot complement loss of type 1 EBNA2 function to maintain the growth of  
81 lymphoblastoid cell lines (20). Amino acids responsible for the differences in B cell growth  
82 maintenance between type 1 and type 2 EBNA2 were mapped to the C-terminal region of  
83 EBNA2 (20). Surprisingly, a single amino acid (aspartate 442 of type 1 EBNA2) in the TAD  
84 appears to be a key determinant of B cell growth maintenance by type 1 EBNA2. Replacing  
85 the serine that occurs at the equivalent position in type 2 EBNA2 (amino acid 409 of type 2  
86 EBNA2) with aspartate (mutant S442D) confers efficient growth maintenance function (21).  
87 Type 2 EBNA2 has reduced ability to activate expression of the EBV oncogene LMP1 and a  
88 small number of cellular genes e.g. CXCR7 (22). These differences in gene activation could  
89 underlie the reduced B cell growth maintenance and transforming function of type 2 EBNA2,  
90 although the mechanism involved and the role played by the single aspartate residue is  
91 unclear. Part of the mechanism may involve (or result in) reduced binding of type 2 EBNA2  
92 to the LMP1 promoter and cell gene regulatory elements (21). EBNA2 binding sites at genes  
93 activated less efficiently by type 2 EBNA2 are enriched for composite binding motifs for  
94 ETS and IRF transcription factors (ETS and IRF composite element; EICE), implicating  
95 ETS/IRF family members in the gene specificity of the observed effects (21).

96

97 Despite a clear deficiency in the immortalising and B cell growth maintenance properties of  
98 type 2 EBNA2 *in vitro*, no specific differences in disease association have been reported to  
99 date for type 1 and type 2 EBV. Interestingly, although the outgrowth of immortalised cells is  
100 less efficient and much slower in primary B cell cultures infected with type 2 EBV (19, 20),  
101 the LCLs that are eventually established from type 2 viruses proliferate at similar rates to  
102 type 1 LCLs. Type 1 and 2 LCLs also show equivalent expression of LMP1 and CXCR7

103 (20). Over extended periods of time, it is therefore possible to select for immortalised cells  
104 infected with type 2 EBV that have the required levels of expression of these genes to support  
105 their long term proliferation. *In vivo* other factors may create an environment that helps  
106 support B cell immortalisation by type 2 EBV.

107

108 New research also suggests that type 2 EBV may use alternative approaches to persist *in vivo*.  
109 Type 2 EBV has the unique capacity to infect T cells in culture and is detected in T cells from  
110 healthy infants from Kenya, indicating that T cell infection may form part of a natural type 2  
111 EBV infection (23, 24). Recent work also showed that a type 2 EBV strain was able to infect  
112 both B cells and T cells in humanised mice (25). Mice infected with type 2 EBV developed  
113 tumours that resembled the diffuse large B-cell lymphomas that also developed in mice  
114 infected with type 1 EBV, confirming the tumorigenic potential of a persistent type 2 EBV  
115 infection, once established (25).

116

117 BS69 (ZMYND11) is a multi-domain chromatin-associated repressor protein that suppresses  
118 transcription elongation, regulates pre-mRNA processing and has tumour suppressor function  
119 (26, 27). The BS69 gene undergoes chromosomal translocation in minimally differentiated  
120 myeloid leukaemia leading to the expression of a BS69-MBTD1 fusion protein (28). BS69  
121 contains three histone reader domains in its N-terminal region; a plant homeodomain, a  
122 bromodomain and a PWWP domain. The tandemly-arranged bromodomain and PWWP  
123 domain bind to histone H3 or the variant histone H3.3 when trimethylated on lysine K36 (27,  
124 29). BS69 also contains a coiled-coil (CC) dimerisation domain adjacent to a MYND domain  
125 in its C terminus. BS69 binds to a number of chromatin modifying enzymes (BRG1, HDAC1,  
126 EZH2) and transcription factors (adenovirus E1a, c-Myb, ETS2, E2F6, and the Myc-

127 associated MGA protein) and inhibits transcription factor activation function (30-34). The  
128 BS69 MYND domain binds to E1a and MGA through a PXLXP motif (34).

129

130 BS69 has also been shown to interact with the TAD of type 1 EBNA2 through two PXLXP  
131 motifs and to restrict EBNA2 transcriptional activation function (34, 35). The structure of the  
132 dimeric CC-MYND domain of BS69 bound to two peptides encompassing sequences from  
133 one of the EBNA2 PXLXP motifs (motif 1) has been solved (35). Based on this three-  
134 dimensional structure, a BS69 dimer was predicted to interact with the two adjacent PXLXP  
135 motifs in type 1 EBNA2. Interestingly the amino acid implicated in the type-specific  
136 differences in growth maintenance observed for type 1 and type 2 EBNA2 (amino acid 442 in  
137 type 1 EBNA2) (21) lies immediately adjacent to the second BS69 binding motif.

138

139 We set out to determine whether sequence differences between type 1 and type 2 EBNA2  
140 affect BS69 binding. We hypothesised that type 2 EBNA2 would show increased binding to  
141 BS69 and that this would impair its gene activation and growth maintenance function. We  
142 initially examined the impact of type-specific differences in EBNA2 amino acid 442 on BS69  
143 binding. We also identified a third PXLXP BS69 binding motif in type 2 EBNA2, so we  
144 examined whether the presence of this extra motif resulted in the interaction of additional  
145 molecules of BS69 with type 2 EBNA2. We found that amino acid 442 did not affect BS69  
146 binding, but influenced the conformation of the TAD, potentially affecting binding of other  
147 transcriptional regulators. We also demonstrated that the third PXLXP motif in type 2  
148 EBNA2 was responsible for the binding of an additional BS69 dimer. Importantly, mutation  
149 of the third PXLXP BS69 binding motif in full length type 2 EBNA2 restored B cell growth

150 maintenance function indicating that increased BS69 binding is responsible for impaired type  
151 2 EBNA2 function.

152

## 153 **Results**

154 *Sequence differences near type 2 EBNA2 BS69 binding motif 2 do not increase BS69 binding.*

155 Previous studies demonstrated that differences in a single amino acid in the TAD between  
156 type 1 and type 2 EBNA2 determined the ability of EBNA2 to maintain the growth of an  
157 EBV-infected LCL (21). This amino acid (located at position 442 in the EBNA2 sequence  
158 from the prototypical type 1 B95-8 strain of EBV) is conserved as aspartate in type 1 strains  
159 and as serine (at the corresponding position of 409) in type 2 strains. In type 1 EBNA2,  
160 aspartate 442 is located immediately adjacent to a previously identified binding motif for the  
161 cell transcriptional repressor BS69 (motif 2) that fits the PXLXP consensus (PILFP<sub>437-</sub>  
162 <sub>441</sub>)(34). In the TAD of type 2 EBNA2, the PXLXP motif is conserved (PFLFP<sub>404-408</sub>) and is  
163 flanked by serine 409 (Figure 1A).

164

165 We hypothesised that the impaired gene activation and growth maintenance properties of type  
166 2 EBNA2 may be the result of increased binding to BS69 as a result of the aspartate to serine  
167 amino acid difference adjacent to BS69 binding motif 2. We therefore tested whether a BS69  
168 binding motif 2 peptide from type 2 EBNA2 showed enhanced binding to BS69 compared to  
169 a motif 2 peptide from type 1 EBNA2. We used isothermal titration calorimetry (ITC) to  
170 determine the affinity of peptide binding to the C-terminal region of BS69 (amino acid 480-  
171 602) comprising the CC-MYND domain that we expressed and purified from *E.coli* (Figure  
172 1B and 1C). In contrast to our hypothesis, we found that the type 2 EBNA2 motif 2 peptide  
173 bound to BS69<sub>CC-MYND</sub> with reduced affinity ( $K_D=176 \mu\text{M}$ ) compared to the corresponding



174 peptide from type 1 EBNA 2 ( $K_D=47.7 \mu\text{M}$ ) (Figure 1B and 1C and Supplementary Table  
175 S1). The affinity of binding of the type 1 EBNA 2 motif 2 peptide to BS69<sub>CC-MYND</sub> was very  
176 similar to the previously reported  $K_D$  of  $35 \mu\text{M}$  (35). The difference in binding between type  
177 1 and type 2 EBNA2 motif 2 peptides could be influenced by both the aspartate to serine  
178 change and differences in two other amino acids present in the sequence (Figure 1B and 1C).

179

180 An additional BS69 PXLXP binding motif previously identified in type 1 EBNA2 (motif 1)  
181 located N-terminal to motif 2 is also present in type 2 EBNA 2 (Figure 1A). The BS69<sub>CC-</sub>  
182 <sub>MYND</sub> dimer binds a type 1 EBNA2 polypeptide containing both motif 1 and motif 2 with high  
183 affinity and the structure of BS69 dimer could accommodate binding to both motifs  
184 simultaneously (35). We therefore tested whether sequence differences in type 2 EBNA2  
185 (including the aspartate to serine change) affected the binding of a region of EBNA2  
186 containing both motif 1 and motif 2 to BS69. Type 1 EBNA2<sub>381-445</sub> and type 2 EBNA2<sub>348-412</sub>  
187 were expressed and purified from *E.coli* and their interaction with BS69<sub>CC-MYND</sub> examined  
188 using ITC. Consistent with previous reports (35) we found that type 1 EBNA2<sub>381-445</sub> bound to  
189 BS69<sub>CC-MYND</sub> with high affinity ( $K_D=0.95 \mu\text{M}$ ) likely due to the high avidity of interaction  
190 with two binding sites (Figure 1D). In the context of this larger region of EBNA2 we found  
191 very little difference in the affinity of type 2 EBNA2 binding to BS69<sub>CC-MYND</sub> ( $K_D=1.21 \mu\text{M}$ )  
192 (Figure 1E). In addition to measuring binding affinities, ITC data can also be used to  
193 calculate binding stoichiometry (n) which can be visualised as the molar ratio at the mid  
194 (inflection) point of the sigmoidal binding curve. We titrated EBNA2 polypeptides into a cell  
195 containing BS69<sub>CC-MYND</sub>, so the stoichiometry values we obtained indicate the molar ratio at  
196 which the EBNA2 polypeptide saturates the available sites in BS69<sub>CC-MYND</sub> monomers.  
197 Consistent with the presence of two BS69 binding sites in the EBNA2 polypeptides, we  
198 obtained n values of 0.42 and 0.33 for type 1 and type 2 EBNA2: BS69<sub>CC-MYND</sub> binding,

199 respectively (Figure 1D and 1E). These approximate to the expected molar ratio of 0.5 taking  
200 into consideration some margin of error in n value determination by ITC, which is heavily  
201 influenced by the accuracy of protein concentrations and the proportion of ‘active’ protein in  
202 the sample.

203

204 We conclude that the aspartate 442 to serine amino acid difference between type 1 and type 2  
205 EBNA2 does not affect the binding of BS69 to the TAD of type 2 EBNA2 in these assays.  
206 Our data also indicate that additional sequence differences in and around BS69 binding  
207 motifs 1 and 2 in type 2 EBNA2 do not influence the binding of the BS69<sub>CC-MYND</sub> dimer to  
208 this region of the protein.

209

210 *Type 2 EBNA2 contains a third BS69 binding site*

211 During the course of our study we also identified a third potential BS69 binding site in the  
212 type 2 EBNA2 TAD (Figure 2A). In type 2 EBNA2, a sequence that is an exact match to the  
213 PXLXP BS69 consensus binding motif is present C-terminal to motif 2 (PTLEP<sub>414-418</sub>). In  
214 type 1 EBNA2 the corresponding region has an isoleucine in place of the leucine residue  
215 (PSIDP<sub>447-451</sub>). To determine whether these regions of EBNA2 also interact with BS69, we  
216 performed ITC experiments using type 1 and type 2 EBNA2 peptides (Figure 2B and 2C).  
217 We were not able to detect any binding of the type 1 EBNA2 peptide encompassing this  
218 region (T1 EBNA2<sub>445-455</sub>) to BS69<sub>CC-MYND</sub>, underscoring the importance of the central leucine  
219 in the PXLXP motif for the BS69 interaction (Figure 2B). In contrast, a peptide from the  
220 corresponding region of type 2 EBNA2 (T2 EBNA2<sub>412-422</sub>) interacted with BS69 with a  
221  $K_D=219 \mu\text{M}$  (Figure 2C). The affinity of interaction with this new motif (that we named  
222 motif 3) is weaker than the interaction we observed for type 1 or type 2 EBNA2 motif 2

223 (Figure 1). To determine the impact of motif 3 on the interaction of type 2 EBNA2 with  
224 BS69<sub>CC-MYND</sub> in the presence of the two other BS69 binding motifs, we expressed and  
225 purified a larger type 2 EBNA2 polypeptide containing motif 1, 2 and 3 (T2 EBNA2<sub>348-422</sub>)  
226 for use in ITC. For comparison, we also analysed the binding of the corresponding larger  
227 region of type 1 EBNA2 (T1 EBNA2<sub>381-455</sub>). We found that inclusion of the additional C-  
228 terminal amino acids had little impact on the affinity of binding of type 1 EBNA2 to BS69<sub>CC</sub>.  
229 MYND or the stoichiometry of binding (compare Figure 2D and Figure 1D) (Supplementary  
230 Table S2). In contrast, for type 2 EBNA2, we observed a change in the stoichiometry of  
231 binding from 0.33 when motif 1 and 2 were present (T2 EBNA2<sub>348-412</sub>) to 0.15 when motif 1,  
232 2 and 3 were present (T2 EBNA2<sub>348-422</sub>) (compare Figure 2E and 1E). This is consistent with  
233 the presence of an additional BS69 binding site and indicates the interaction of T2 EBNA2<sub>348-</sub>  
234 <sub>422</sub> with an additional BS69<sub>CC-MYND</sub> molecule. Perhaps surprisingly, we did not observe an  
235 increase in the affinity of binding of the longer type 2 EBNA2 polypeptide to BS69<sub>CC-MYND</sub>  
236 (compare Figure 2E and 1E). Nonetheless the recruitment of more BS69 to type 2 EBNA2  
237 could be physiologically relevant for the function of type 2 EBNA2 as a transcriptional  
238 activator. To confirm that the observed change in binding stoichiometry was due to the  
239 presence of motif 3 in the type 2 EBNA2 polypeptide, we analysed the binding of T2  
240 EBNA2<sub>348-422</sub> with motif 3 mutated from PTLEP to ATAEA (T2 EBNA2<sub>348-422</sub> motif 3 mt).  
241 We found that mutation of motif 3 altered the stoichiometry of binding to BS69<sub>CC-MYND</sub> from  
242 0.15 to 0.30, consistent with the loss of a BS69 binding motif (Figure 2F). This is similar to  
243 the value obtained for the type 2 EBNA2 polypeptide containing only motif 1 and motif 2 (T2  
244 EBNA2<sub>348-412</sub>)(Figure 1E). We conclude that type 2 EBNA2 contains an additional binding  
245 site for BS69 that is not present in type 1 EBNA2.

246

247 *Three BS69 CC-MYND dimers bridge two molecules of type 2 EBNA2*

248 To further examine whether type 2 EBNA2 could form higher-order complexes with the  
249 BS69 CC-MYND domain that are larger than type 1 EBNA2, we examined the properties of  
250 BS69-EBNA2 complexes using size exclusion chromatography (SEC). Consistent with  
251 complex formation, when pre-incubated with BS69<sub>CC-MYND</sub>, both T1 EBNA2<sub>381-455</sub> and T2  
252 EBNA2<sub>348-422</sub> polypeptides migrated through the size exclusion column faster and eluted at a  
253 lower elution volume compared to the migration of each component individually (Figure 3A).  
254 In line with the binding of additional BS69<sub>CC-MYND</sub> molecules to T2 EBNA2<sub>348-422</sub> and the  
255 formation of higher molecular weight complexes, we found that type 2 EBNA2 complexes  
256 eluted at a lower volume than type 1 EBNA2 complexes (Figure 3A). SDS-PAGE of SEC  
257 column fractions confirmed the presence of BS69<sub>CC-MYND</sub> and EBNA2 in the higher  
258 molecular weight complexes (Figure 3B). Note that both type 1 and type 2 EBNA2  
259 polypeptides migrate anomalously on SDS-PAGE gels and not at their predicted molecular  
260 weights (MW) of 7.9 and 8.1 kDa respectively, likely due to their high proline content  
261 (Figure 3B). They are however pure and resolve as single species on gel filtration columns  
262 (Figure 3A).

263

264 Because migration in SEC is influenced by both size and shape and BS69<sub>CC-MYND</sub> has an  
265 elongated structure due to the CC domain, we were unable to determine the MW of BS69-  
266 EBNA2 complexes accurately using SEC. In order to obtain more accurate MW information  
267 that would allow us to determine the number of molecules of BS69<sub>CC-MYND</sub> and EBNA2  
268 present in type 1 and type 2 complexes, we used SEC with multi-angle light scattering (SEC-  
269 MALS) (Table 1). SEC-MALS gave MWs for T1 EBNA2<sub>381-455</sub> and T2 EBNA2<sub>348-422</sub> that  
270 matched the theoretical MW of their monomeric forms and gave a MW for BS69<sub>CC-MYND</sub>  
271 consistent with its dimeric state (Table 1). For the T1 EBNA2<sub>381-455</sub>-BS69<sub>CC-MYND</sub> complex,  
272 SEC-MALS gave a MW of 62.3 kDa. Given that there are two binding sites for BS69 in the

273 T1 EBNA2<sub>381-455</sub> polypeptide, this figure most closely matches the MW of a complex  
274 containing two type 1 EBNA2 polypeptides and two BS69<sub>CC-MYND</sub> dimers (theoretical MW of  
275 76.7 kDa) rather than a single type 1 EBNA2 polypeptide with a one dimer of EBNA2  
276 BS69<sub>CC-MYND</sub> (theoretical MW of 38.3 kDa) (Table 1). For the BS69<sub>CC-MYND</sub>-T2 EBNA2<sub>348-422</sub>  
277 complex, SEC-MALS gave a MW of 135 kDa consistent with the larger complex size  
278 observed in SEC (Table 1 and Figure 3A). Given the presence of three BS69 binding motifs  
279 in type 2 EBNA2, this MW most closely matches that of a complex containing three BS69<sub>CC-</sub>  
280 <sub>MYND</sub> dimers and two type 1 EBNA2 polypeptides (theoretical MW of 107.5 kDa) (Table 1).

281

282 Because of the discrepancies in the theoretical and experimentally determined MWs for  
283 BS69<sub>CC-MYND</sub>-EBNA2 complexes, we also used small-angle-X-ray scattering (SAXS) to  
284 obtain information on the shape and size of these complexes in solution. Initially we used  
285 SEC-SAXS to analyse each polypeptide individually. We used a Kratky representation to  
286 visualize features of the scattering profiles obtained for T1 EBNA2<sub>381-45</sub>, T2 EBNA2<sub>348-422</sub>  
287 and BS69<sub>CC-MYND</sub> individually to identify the folding state of the polypeptides in solution.  
288 The absence of a bell-shaped curve with a well-defined maximum for both EBNA2  
289 polypeptides indicates that they are natively unfolded in solution (Supplementary Figure S1).  
290 The bell-shaped curve obtained for the BS69<sub>CC-MYND</sub> dimer indicates that it is folded in  
291 solution as expected from the crystal structure (35). Three-dimensional models were created  
292 for the individual polypeptides by *ab initio* shape determination. For BS69<sub>CC-MYND</sub> a solution  
293 structure consistent with the coiled-coil dimer structure determined by X-ray crystallography  
294 was obtained (35)(Supplementary Figure S2). For the EBNA2 polypeptides, solution  
295 structures consistent with flexible unfolded peptide chains were obtained (Supplementary  
296 Figure S2). SAXS analysis of BS69<sub>CC-MYND</sub> pre-mixed with either type 1 or type 2 EBNA2  
297 polypeptides gave a larger Porod volume (directly related to MW) compared to the individual

298 proteins, consistent with complex formation (Supplementary Table S3). An *ab initio* dummy  
299 atom model was generated for the type 1 EBNA2-BS69<sub>CC-MYND</sub> complex and this fitted well  
300 to the experimental SAXS data ( $\chi^2$  of 1.4) (Figure 4A). The three-dimensional model  
301 generated by *ab initio* shape determination for the type 1 EBNA2-BS69<sub>CC-MYND</sub> complex  
302 indicated that the complex has a large elongated shape with a volume of 166 nm<sup>3</sup> and a  
303 maximum dimension (D<sub>max</sub>) of 138 Å (Figure 4B). This three-dimensional model could  
304 accomodate two BS69<sub>CC-MYND</sub> dimer structures that were manually docked into the SAXS  
305 envelope. The additional space at the bottom of the model was allocated to the model solution  
306 structures of two type 1 EBNA2 polypeptides (Figure 4B). This docked structural model for  
307 the type 1 EBNA2-BS69<sub>CC-MYND</sub> complex was then fitted to the experimental scattering data  
308 and gave a reasonable  $\chi^2$  value of 2.56. For comparison a structural model where only one  
309 BS69<sub>CC-MYND</sub> dimer and a single type 1 EBNA2 polypeptide were docked into the SAXS  
310 envelope was created but this alternative model gave a worse fit to the experimental data  
311 (Supplementary Figure S3). An *ab initio* dummy atom model was then generated for the type  
312 2 EBNA2-BS69<sub>CC-MYND</sub> complex and this fitted well to the experimental SAXS data ( $\chi^2$  of  
313 1.0) (Figure 4C). The three-dimensional model created by *ab initio* shape determination for  
314 the type 2 EBNA2 complex had a larger volume (239 nm<sup>3</sup>) and maximum dimension (145 Å)  
315 than the type 1 EBNA2 complex model (Figure 4D). The type 2 EBNA2 model could  
316 accommodate the docking of three BS69<sub>CC-MYND</sub> dimer structures along with two type 2  
317 EBNA2 polypeptides and this structural model gave a good fit to the experimental data ( $\chi^2$  of  
318 1.44) (Figure 4C and D). In comparison a docked model containing two BS69<sub>CC-MYND</sub> dimers  
319 and a single type 2 EBNA2 polypeptide gave a worse fit to the experimental data  
320 (Supplementary Figure S3).

321

322 Taken together our data indicate that BS69 forms higher order complexes with EBNA2 that  
323 involve the interaction of each MYND domain of the BS69 dimer with binding sites in two  
324 separate EBNA2 molecules. Rather than an *in vitro* artefact, this intermolecular ‘bridging’  
325 interaction is consistent with the fact that EBNA2 forms dimers *in vivo*. Although the N-  
326 terminal regions of EBNA2 that mediate dimerisation (36) are absent in the EBNA2  
327 polypeptides we examined in our interaction studies, our data indicate that BS69 may have  
328 the capacity to stabilise or enhance dimerisation between two EBNA2 molecules held  
329 together through their N-termini. Importantly, using multiple independent techniques, we also  
330 demonstrate that type 2 EBNA 2 interacts with an additional BS69<sub>CC-MYND</sub> dimer.

331

### 332 *The serine to aspartate change in type 2 EBNA2 alters its binding characteristics*

333 During the course of our ITC experiments we observed that binding data obtained using the  
334 longer EBNA2 polypeptides (T1 EBNA2<sub>381-455</sub> and T2 EBNA2<sub>348-422</sub>) showed some deviation  
335 from curves fitted using the single binding event (‘one set of sites’) model (where binding to  
336 multiple sites cannot be detected as separate heat change events) (Figure 2D and 2E). This  
337 suggested that the mode of binding of these polypeptides to BS69<sub>CC-MYND</sub> could involve more  
338 than one distinguishable binding event. To determine whether this was the case, we  
339 performed ITC experiments using an increased number of smaller injections of the EBNA2  
340 polypeptide to obtain more data points for curve fitting (Figure 5). For T1 EBNA2<sub>381-455</sub> the  
341 binding data did not fit well to curves generated using an alternative two binding event (‘two  
342 sets of sites’) model ( $\chi^2/\text{degrees of freedom}=0.56$ ) (Figure 5A and Supplementary Table S2).  
343 This indicates that the deviation of T1 EBNA2<sub>381-455</sub>-BS69<sub>CC-MYND</sub> binding data from fitted  
344 curves at low molar ratios was unlikely to be the result of a separate binding event (Figure 2D  
345 and 5A). In contrast, for T2 EBNA2<sub>348-422</sub> the binding profiles obtained fitted well to curves

346 generated using the two binding event model ( $\chi^2/\text{degrees of freedom}=0.23$ ) (Figure 5B and  
347 Supplementary Table S2). This enabled the affinity of the two separate binding events to be  
348 determined, which were both in the nanomolar range ( $K_{D1}=0.009 \mu\text{M}$  and  $K_{D2}=0.091 \mu\text{M}$ ).  
349 These data indicate that this region of type 2 EBNA2 may adopt a different conformation to  
350 type 1 EBNA2 when binding to BS69<sub>CC-MYND</sub>.

351

352 In further experiments we addressed the impact of changing the serine at position 409 in type  
353 2 EBNA2 to the aspartate present at the equivalent position (aspartate 442) in type 1  
354 EBNA2 on BS69 binding in the context of the longer type 2 EBNA2 polypeptide containing  
355 three BS69 binding sites. To do this we expressed and purified a type 2 EBNA2 polypeptide  
356 with an S409D mutation (T2 EBNA2<sub>348-422</sub> SD mutant). Interestingly, we found that the SD  
357 substitution enhanced the detection of the second binding event on interaction with BS69<sub>CC-</sub>  
358 MYND (Figure 5C). The second binding event for T2 EBNA2<sub>348-422</sub> SD was associated with a  
359 larger change in enthalpy ( $\Delta H$  -7.65 kcal/mol) than the second binding event detected for T2  
360 EBNA2<sub>348-422</sub> ( $\Delta H$  -1.59 kcal/mol) (Supplementary Table S2). Importantly we found that the  
361 affinities of the two binding events remained largely unaffected (Figure 5B and C), consistent  
362 with our earlier observations that the presence of serine at position 409 does not affect the  
363 ability of a type 2 polypeptide containing motif 1 and motif 2 to bind BS69 (Figure 1). To  
364 determine whether the impact of the SD mutation was dependent on the presence of BS69  
365 binding motif 3, we also produced a polypeptide containing the SD and motif 3 mutation  
366 (EBNA2<sub>348-422</sub> SD + m3 mt). We found that two binding events were still clearly detectable  
367 on interaction of this double mutant type 2 EBNA2 polypeptide with BS69<sub>CC-MYND</sub> and that  
368 the enthalpy change of the second binding event was similar to that of the single SD mutant  
369 ( $\Delta H$  -9.62 kcal/mol) (Supplementary Table S2) indicating that the impact of the SD change is  
370 still evident. The affinity of the second binding event ( $K_{D2}$ ) was however reduced by



371 approximately 2-fold for EBNA2<sub>348-422</sub> SD + m3 mt compared to the EBNA2<sub>348-422</sub> SD mutant  
372 (Figure 5C and D). These data indicate that motif 3 contributes to the second binding event.  
373 We conclude that the SD mutation previously shown to enhance the growth maintenance  
374 properties of type 2 EBNA2 (21) does not affect BS69 binding but likely alters the  
375 conformation of the type 2 EBNA2 TAD. This may therefore impact on the binding of other  
376 transcriptional regulators that influence type 2 EBNA2 function.

377

### 378 *Full-length type 2 EBNA2 binds BS69<sub>CC-MYND</sub> more efficiently in pull-down assays*

379 To confirm our *in vitro* observations that a type 2 EBNA2 polypeptide binds an additional  
380 BS69 dimer, we examined the interaction of BS69<sub>CC-MYND</sub> with full-length EBNA2 proteins  
381 stably expressed in B cells. Lysates from cells expressing type 1 or type 2 EBNA2 or the type  
382 2 SD mutant were incubated with recombinant GST-BS69<sub>CC-MYND</sub> immobilised on  
383 glutathione beads for increasing times and the amount of EBNA2 precipitated determined by  
384 Western Blotting (Figure 6). Consistent with the presence of an additional BS69 binding site  
385 in type 2 EBNA2, we found that GST-BS69<sub>CC-MYND</sub> pulled down type 2 EBNA2 more  
386 efficiently than type 1 EBNA2 at short incubation times (Figure 6). In agreement with our *in*  
387 *vitro* observations using the type 2 EBNA2 SD mutant, we found that this protein interacted  
388 with BS69<sub>CC-MYND</sub> with the same efficiency as type 2 EBNA2 (Figure 6). After 30 minutes  
389 incubation, GST-BS69<sub>CC-MYND</sub> became saturated with EBNA2 and differences in association  
390 were no longer evident. A control GST fusion protein (GST-Rab11) did not precipitate  
391 EBNA2, confirming the specificity of the interactions. These data therefore confirm the  
392 increased association of BS69<sub>CC-MYND</sub> with type 2 EBNA2.

393

### 394 *Mutation of BS69 binding motif 3 in type 2 EBNA2 increases its growth maintenance function*

395 To determine whether the presence of the additional BS69 binding motif in type 2 EBNA2  
396 (motif 3) had functional consequences for the activity of type 2 EBNA2, we examined the  
397 ability of a type 2 EBNA2 motif 3 mutant to maintain B cell growth. We utilised a previously  
398 described assay using an EBV-infected LCL (EREB2.5) in which the activity of a type 1  
399 estrogen receptor-EBNA2 fusion protein can be switched off by estrogen withdrawal (37).  
400 Loss of EBNA2 activity leads to growth arrest, but transfection of a stably-maintained  
401 plasmid expressing type 1 EBNA2 into these cells supports their survival (20). In contrast,  
402 the expression of type 2 EBNA2 cannot maintain the growth of these cells (20). We found  
403 that mutation of BS69 binding motif 3 produced a type 2 EBNA2 protein that was able to  
404 support the recovery of these cells from the loss of type 1 EBNA2 activity, with cells  
405 recovering well 2-4 weeks following estrogen withdrawal (Figure 7A). The type 2 EBNA2  
406 motif 3 mutant behaved similarly to the type 2 EBNA2 SD mutant that was previously shown  
407 to support B cell growth in this assay (21). We also examined the ability of the SD and motif  
408 3 double mutant in this assay and found that it showed a slightly increased ability to support  
409 B cells growth (Figure 7A). In our hands, expression of type 1 EBNA2 supported initial  
410 growth in this assay better than any type 2 mutants, with the mutants supporting growth  
411 recovery from 2 weeks (Figure 7A). We confirmed that all EBNA2 proteins were expressed  
412 at similar levels (Figure 7B). We conclude that the presence of the additional BS69 binding  
413 motif in type 2 EBNA2 impairs the ability of type 2 EBNA2 to maintain B cell growth.

414

415 *A BS69 isoform containing the MYND domain is expressed in type 1 and type 2 EBV-infected*  
416 *cells.*

417 BS69 functions as a negative regulator of EBNA2 transcription activity in reporter assays  
418 (34, 35), but previous studies have reported that BS69 expression is downregulated on

419 infection of resting B cells by EBV and is low in the resulting immortalised LCLs (35).  
420 Transcriptional repression of BS69 by EBNA2 was implicated in BS69 downregulation  
421 indicating that EBNA2 may act to restrict expression of its own negative regulator (35). The  
422 cell lines examined in this previous study all harboured type 1 EBV or type 1 EBNA2, so we  
423 next addressed whether BS69 was expressed at similar levels in cells infected with type 1 and  
424 type 2 EBV. We examined BS69 protein levels in type 1 and type 2 LCLs using an anti-BS69  
425 antibody raised against a region within the MYND domain of BS69. We found that BS69 was  
426 expressed at similar levels in type 1 and type 2 LCLs, but surprisingly levels in LCLs were  
427 similar to those in an EBV negative B cell line (AK31) (Figure 8A). We expanded our  
428 analysis to include additional EBV negative B cell lines (BJAB and DG75), EBV infected  
429 cell lines displaying the EBNA1 only latency I pattern of EBV gene expression (Akata and  
430 Mutu I), an additional type 1 LCL (IB4) and a BL cell line expressing all EBV latent proteins  
431 including EBNA2 (Mutu III) (both latency III cell lines) (Figure 8B). We found no  
432 correlation between BS69 expression and EBV infection or EBNA2 expression (Figure 8B).  
433 BS69 did not therefore appear to be downregulated as a result of EBNA2 expression. We also  
434 examined BS69 expression over the course of a primary B cell infection and found that BS69  
435 was not downregulated as previously reported (Figure 8C).

436

437 We therefore explored the possibility that we were detecting a different isoform of BS69.  
438 Alternative splicing has been reported to give rise to different BS69 isoforms and four have  
439 been experimentally verified (33) (Figure 9A). The canonical isoform (isoform 1, UniProt  
440 identifier: Q15326-1) contains 15 exons and encodes a protein of 71 kD (602 amino acids).  
441 Isoform 2 (Q15326-2) lacks amino acids 93-146 encoding the PHD domain (exon 4) and  
442 encodes a protein of 64.4 kD. Isoform 3 (Q15326-3) lacks amino acids 563-602 encoding the  
443 MYND domain (exon 15) and has a unique C-terminus encoded by an extended exon 14

444 sequence. Isoform 3 encodes a protein of 66.6 kD. Isoform 4 (Q15326-3) lacks exon 4 and  
445 exon 15 (and thus both the PHD and MYND domains) and encodes a protein of 60 kD. These  
446 isoforms were previously described as full length (FL),  $\Delta$ PHD,  $\Delta$ MD and  $\Delta$ PHD,  $\Delta$ MD  
447 respectively (33), but the exon numbering used in this previous study differed. The BS69  
448 protein detected in Figure 8A and B has a molecular weight of approximately 64 kD  
449 consistent with that expected for isoform 2. This was the only protein detected by this  
450 antibody (against the MYND domain), indicating that isoform 1 was not expressed in the cell  
451 lines examined. Since the antibody we used would not detect BS69 isoforms 3 and 4, we  
452 could not exclude the possibility that one or more of these isoforms was also expressed and  
453 that an alternative BS69 isoform was detected previously (35). In line with this possibility,  
454 we noted that the QPCR analysis carried out by Harter *et al* used primers located in exon 4,  
455 which is absent from isoform 2.

456

457 No detail was provided on the anti-BS69 antibody used previously (35) and we were not able  
458 to find another antibody that detected isoform 3 and 4 in Western blotting. We therefore took  
459 a non-quantitative PCR approach to screen for different BS69 isoforms using cDNA prepared  
460 from LCLs and from B cells during a primary EBV infection. PCR using a forward primer in  
461 exon 3 and a reverse primer in exon 13 amplified two products indicating the presence of at  
462 least two different isoforms, one containing exon 4 (1139 bps) and one lacking exon 4 (977  
463 bps) (Figure 9B). This would be consistent with the presence of isoform 3 (which contains  
464 exon 4) and isoform 2 (which lacks exon 4 and was detected by Western blotting (Figure 8)).  
465 PCR products were sequenced to confirm their identity (data not shown). However, since  
466 isoform 4 also lacks exon 4, this PCR analysis cannot rule out the additional presence of  
467 isoform 4. Since in isoforms 3 and 4 exon 15 is replaced by a short unique 3' sequence from  
468 exon 14, we designed reverse PCR primers in this unique 3' region. PCR using these primers

469 amplified only one product of 1578 bps consistent with presence of exon 4 and the unique 3'  
470 region (isoform 3) (Figure 9B). The identity of this PCR product was again confirmed by  
471 sequencing (data not shown). Importantly, we did not detect a smaller product (1416 bps) that  
472 would indicate the presence of isoform 4 (lacks exon 4 and exon 15). Our data therefore  
473 indicate that LCLs infected with either type 1 or type 2 EBV express both isoform 2 and  
474 isoform 3 of BS69.

475

476 To quantitatively examine whether either BS69 isoform 2 or isoform 3 were downregulated  
477 on EBV infection and in cells expressing EBNA2 as previously described (35), we used  
478 QPCR to analyse BS69 mRNA expression in primary B cells infected by EBV and in a panel  
479 of EBV negative and positive B cell lines. QPCR using primers that spanned exon 14 and  
480 exon 15 (present in isoform 1 and 2) detected variable levels of BS69 across the cell lines  
481 examined, with no obvious correlation with EBV positivity or EBNA2 expression (present in  
482 latency III EBV infected cell lines). This is consistent with the variability in BS69 protein  
483 expression detected in Western blot analysis of isoform 2 expression (Figure 8). Although, in  
484 one experiment (#2) primary B cells expressed high levels of BS69 isoform 2 mRNA that  
485 were reduced on EBV infection, the second primary infection experiment did not reproduce  
486 this observation. In fact, primary infection #2 was the same infection analysed by Western  
487 blotting in Figure 8C so this change in BS69 RNA expression did not result in decreased  
488 expression of BS69 isoform 2 protein. It is most likely therefore that BS69 isoform 2  
489 expression varies in an EBV and EBNA2 independent manner. Analysis of BS69 mRNA  
490 expression using QPCR primers that would specifically amplify BS69 isoforms containing  
491 the long form of exon 14 (isoforms 3 and 4) also detected variable expression of BS69 that  
492 did not correlate with EBV positivity or EBNA2 expression indicating that isoform 3  
493 expression is also EBV independent (Figure 9D).

494

495 We conclude that B cells infected with type 1 or type 2 EBV do not consistently display  
496 reduced expression of any detectable isoform of BS69 compared to uninfected B cells. Since  
497 BS69 isoform 2 contains the MYND domain that binds EBNA2 (that is absent in isoform 3),  
498 the continued expression of isoform 2 in EBV infected B cells would be expected to restrict  
499 the gene activation function of EBNA2.

500

501 *Inhibition of BS69 function increases EBNA2 transactivation activity*

502 To determine whether inhibition of BS69 function increased EBNA2 transactivation function,  
503 we carried out EBNA2 transactivation assays in an EBV negative B cell line (BJAB) in  
504 which we overexpressed isoform 3 of BS69 lacking the MYND domain ( $\Delta$ MYND) (but  
505 containing the coiled-coil dimerisation domain). This form of BS69 has been proposed to act  
506 as a dominant negative inhibitor of the MYND-domain dependent functions of BS69 (33).  
507 We performed transactivation assays using EBNA2-GAL4-DNA binding domain (DBD)  
508 fusion proteins and a Firefly luciferase reporter plasmid containing a synthetic promoter with  
509 4 GAL4 binding sites. Plasmids expressing GAL4-DBD fusion proteins containing regions of  
510 type 1 EBNA2 (334-487) and type 2 EBNA2 (301-454) encompassing all BS69 binding  
511 motifs were transfected into BJAB cells in the presence or absence of plasmids expressing  
512 either full length BS69 (isoform 1) or isoform 3 ( $\Delta$ MYND). Consistent with previous reports,  
513 we found that overexpression of full length BS69 inhibited transactivation by type 1 EBNA2  
514 (34, 35) (Figure 10). BS69 also inhibited transactivation by type 2 EBNA2 (Figure 10).  
515 Consistent with its function as a dominant negative inhibitor, we found that expression of  
516 BS69  $\Delta$ MYND increased transactivation by both type 1 and type 2 EBNA2 (Figure 10). To  
517 determine whether this was a non-specific or EBNA2-dependent effect, we expressed BS69

518  $\Delta$ MYND in the absence of any GAL4-DBD-EBNA2 expressing constructs. In the absence of  
519 EBNA2 fusion protein expression, BS69  $\Delta$ MYND had no effect on the activity of the GAL4  
520 reporter (Figure 10). These data therefore demonstrate that inhibition of the MYND-domain  
521 dependent function of BS69 in B cells relieves repression of EBNA2 transactivation. These  
522 data support our hypothesis that the expression of MYND-domain containing BS69 isoforms  
523 in B cells impedes EBNA2 gene activation function.

524

525 Taken together our *in vitro* and cell-based assays suggest that during initial B cell infection  
526 the increased association of BS69 with type 2 EBNA2 may impede key gene activation  
527 events that are required for the efficient outgrowth of immortalised cell lines.

528

529

530

531

532

533

534

535

536 **Discussion**

537 Type 2 EBV strains have reduced B cell transformation capacity and type 2 EBNA2 activates  
538 some viral and cell genes less efficiently than type 1 EBNA2, a feature that may underlie the  
539 impaired transformation phenotype. We have identified an additional binding site for the  
540 transcriptional repressor BS69 in the EBNA2 protein encoded by type 2 strains of EBV and  
541 show that mutation of this additional binding site improves the B cell growth maintenance  
542 properties of type 2 EBNA2. Our data therefore implicate increased BS69 association in the  
543 impaired function of type 2 EBNA2.

544

545 Type 2 EBV transforms resting B cells more slowly and results in the outgrowth of less  
546 immortalised cell clones than type 1 EBV (1, 19). Although early type 2 EBV transformants  
547 show reduced cell growth, the immortalised LCLs that eventually arise from a type 2 EBV  
548 infection grow similarly to those infected with type 1 EBV. Type 2 LCLs also maintain  
549 similar levels of expression of key EBNA2 target genes (20). This indicates that the impaired  
550 function of type 2 EBNA2 restricts an early stage in the B cell transformation process *in*  
551 *vitro*. Indeed two EBNA2 target genes that are only weakly activated by type 2 EBNA2  
552 compared to type 1 EBNA2 (22), the viral oncogene LMP1 and the cell gene CXCR7,  
553 display slower and weaker induction during primary infection with type 2 EBV (20).  
554 Although it was previously reported that BS69 is downregulated on EBV infection, we found  
555 that there is continued expression of BS69 isoform 2 in EBV-infected cells. Since this  
556 isoform contains the MYND domain that mediates the BS69-EBNA2 interaction the  
557 expression of BS69 would be expected to restrict EBNA2 activation function. Consistent  
558 with this prediction we found that the expression of a dominant negative form of BS69  
559 (isoform 3) lacking the MYND domain enhances EBNA2 activation function in B cells. Our



560 data are consistent with a model where BS69 acts as a restriction factor for both type 1 and  
561 type EBNA2 but the association of type 2 EBNA2 with more molecules of the BS69  
562 repressor protein further restricts the activation of growth and survival genes important in  
563 early transformation. Why a small number of specific genes are activated less well by type 2  
564 EBNA2 is as yet not fully clear, but sequences resembling EICEs (bound by ETS and IRF  
565 transcription factors) are found at EBNA2 binding sites in the LMP1 promoter and binding  
566 sites closest to the cell genes that show reduced activation by type 2 EBNA2. Interestingly  
567 BS69 binding to PXLXP motifs in ETS2 has been shown to inhibit its transactivation activity  
568 (32). Since the ETS family member PU.1 is known to bind to the putative EICE in the LMP1  
569 promoter and plays a role in LMP1 promoter activation, it is possible that type 2 EBNA2  
570 functions less well in the context of PU.1 binding sites. Interestingly, PU.1 also contains  
571 PXLXP motifs that would be predicted to bind BS69, so enhanced tertiary complex formation  
572 between type 2 EBNA2, BS69 and PU.1 at the regulatory elements of specific genes may  
573 function to stabilise BS69 binding and further restrict gene activation by type 2 EBNA2.

574

575 Our data also provide important new molecular information on the nature of the complexes  
576 formed between EBNA2 and BS69 that may be applicable to the way BS69 interacts with other  
577 cellular and viral transcription factors via its MYND domain. Single and multiple PXLXP  
578 BS69 binding motifs have been identified in the cell and viral binding partners of BS69, but  
579 the elucidation of the structure of the dimeric coiled-coil-MYND domain of BS69 led to a  
580 model that proposed that a BS69 dimer bound to the two adjacent PXLXP motifs (motif 1  
581 and motif 2) in the same type 1 EBNA2 molecule (35). However, although the authors found  
582 that BS69 bound with increased affinity when two PXLXP motifs were present in EBNA2  
583 polypeptides, the three-dimensional structure obtained comprised a BS69<sub>CC-MYND</sub> dimer  
584 bound to two separate type 1 EBNA2 motif 1 peptides. Although the binding of motif 1 and

585 motif 2 could be accommodated in the BS69<sub>CC-MYND</sub> structure if the intervening 52 amino  
586 acids were looped out, the formation of this complex has not been formally demonstrated  
587 (35). Our SEC-MALS and SAXS analysis provides the first evidence that the BS69<sub>CC-MYND</sub>  
588 dimer preferentially forms an intermolecular bridge between PXLXP motifs located on  
589 different EBNA2 molecules. This mode of binding is consistent with the fact that EBNA2 is a  
590 dimeric protein, with dimerisation mediated by the N-terminal END domain comprising  
591 amino acids 1-58 (36). Additional self-associating regions have also been mapped elsewhere  
592 in EBNA2 and include amino acids 97–121 and 122-344 (38, 39), although no molecular  
593 information is available on how these regions may contribute to dimerisation. Our data  
594 indicate that BS69 binding to sites in the C-terminal transactivation domain may contribute to  
595 the formation or stabilisation of EBNA2 dimers. Interestingly, although SEC analysis clearly  
596 demonstrated complex formation between both type 1 and type 2 EBNA 2 polypeptides and  
597 BS69<sub>CC-MYND</sub>, the elution profiles of both complexes were broad. The type 1 EBNA2-BS69<sub>CC-</sub>  
598 <sub>MYND</sub> elution profile had a clear shoulder indicating the presence of smaller MW complexes  
599 (Figure 3A). This would explain why the average MW determined by SEC-MALS was  
600 smaller than expected for a complex that contained two molecules of type 1 EBNA2 and two  
601 BS69<sub>CC-MYND</sub> dimers. It is possible that in solution *in vitro* there is a mixed population of  
602 dimeric type 1 EBNA2 and monomeric type 1 EBNA2 complexes (where a single EBNA2  
603 polypeptide is bound by one BS69<sub>CC-MYND</sub> dimer as previously proposed). We were not able  
604 to investigate this further using SAXS as this ‘shoulder’ was not clearly defined, so SAXS  
605 analysis for both type 1 and type 2 EBNA2-BS69 complexes focused on the major elution  
606 peak of the large complex. Given that full length EBNA2 expressed in EBV-infected cells is  
607 a dimer, complexes involving two EBNA2 molecules are more likely to be physiologically  
608 relevant.

609

610 Surprisingly, in our GAL4-EBNA2 fusion protein assays we did not see weaker  
611 transactivation by the type 2 EBNA2 fusion protein compared to the type 1 EBNA2 fusion  
612 protein as reported previously (21). We used a longer region of EBNA2 compared to this  
613 previous study that encompassed all three BS69 binding sites for type 2 EBNA2 and the  
614 corresponding region of type 2 EBNA2 (with only two functional BS69 binding sites).  
615 Previously GAL4-EBNA2 fusion protein constructs were used that expressed a type 1  
616 EBNA2 protein containing only BS69 binding motif 2 or the corresponding region of type 2  
617 EBNA2 that contained BS69 binding motif 2 and 3 (21). It is not completely clear why the  
618 increased association of BS69 with type 2 EBNA2 is not associated with weaker  
619 transactivation in our assays in the context of a longer region of EBNA2, but it could point to  
620 the importance of the dimerisation that occurs in the context of the full-length protein in the  
621 assembly of larger BS69-EBNA2 complexes.

622

623 When considering the nature of assembly of BS69-EBNA2 complexes, it is likely that  
624 binding to motif 1 (which in type 1 EBNA2 has the highest affinity for BS69<sub>CC-MYND</sub>) would  
625 drive the initial interaction between EBNA2 and BS69 and binding to motif 1 probably  
626 constitutes the first binding event that can be distinguished in our ITC analysis using an  
627 increased number of injections. For type 2 EBNA2, since both motif 2 and 3 bind BS69 with  
628 similar affinity, binding to both of these motifs probably occurs with similar kinetics and is  
629 detectable as a single second binding event by ITC. Given the fact that BS69<sub>CC-MYND</sub> dimers  
630 are predicted in the solution structure of the BS69-EBNA2 complex to be located side by side  
631 along a dimeric EBNA2 molecule, it is possible that interactions between BS69 coiled-coil  
632 dimers play a role in stabilising the oligomeric complex.

633

634 Our initial interest in examining type-specific binding of EBNA2 to BS69 centred around the  
635 influence of a serine residue in the TAD of type 2 EBNA2 that plays a key role in restricting  
636 B cell growth maintenance by type 2 EBNA2 (21). Although this residue is located  
637 immediately adjacent to BS69 binding motif 2 in type 2 EBNA2, we found that it did not  
638 increase BS69 binding (as might have been expected) when binding was compared to the  
639 corresponding region of type 1 EBNA2 where there is an aspartate residue in its place. It does  
640 not appear therefore that the influence of serine 409 on growth maintenance is mediated  
641 through alterations in BS69 binding affinity. Our ITC analysis however did find that a serine  
642 to aspartate change at this position in type 2 EBNA2 altered the nature of BS69 binding  
643 indicating that it may induce a conformational change in this region of EBNA2. This could  
644 result in differences in the binding of other transcription regulators to the type 2 EBNA2  
645 TAD compared to the type 1 EBNA2 TAD. Possibilities could include increased binding of a  
646 repressor or co-repressor to the type 2 EBNA2 TAD or decreased binding of an activator or  
647 co-activator.

648

649 BS69 may have a wider role in regulating B cell transformation and the growth of EBV-  
650 infected cells in addition to its modulation of EBNA2 transactivation. BS69 localised to the  
651 cell membrane has also been implicated as an adaptor in signalling mediated by the EBV  
652 oncogene LMP1. The MYND domain of BS69 was reported to bridge an interaction between  
653 the carboxy terminal cytoplasmic domain of LMP1 and the TRAF6 signalling protein to  
654 activate the JNK signalling pathway (40). Conversely, BS69 has also been implicated as a  
655 negative regulator of LMP1-mediated NF- $\kappa$ B signalling by decreasing the association  
656 between C-terminal activation region (CTAR) 2 of LMP1 and the signalling adaptor TRADD  
657 (41) and by binding to CTAR1 and bringing in the negative regulator of NF- $\kappa$ B signalling,  
658 TRAF3 (42). Although further work appears to be required to fully understand the role of

659 BS69 in LMP1 signalling and the relative proportions of nuclear and membrane-associated  
660 BS69, it is possible that BS69 is a key modulator of growth promoting events in EBV-  
661 infected cells. In this context, our work now sheds new light on how transformation by type 2  
662 strains of EBV may be specifically curbed as a result of sequence variation that results in the  
663 creation of an additional binding site for BS69.

664

## 665 **Materials and Methods**

### 666 *Cell lines*

667 All cell lines were passaged twice weekly in RPMI 1640 media (Invitrogen) supplemented  
668 with 10% Fetal Bovine serum (Gibco), 1 U/ml penicillin G, 1 µg/ml streptomycin sulphate  
669 and 292 µg/ml L-glutamine at 37°C in 5% CO<sub>2</sub>. DG75 (43) and AK31 (44) are EBV negative  
670 BL cell lines and BJAB (45) is an EBV negative B cell lymphoma line. Akata (46) and Mutu  
671 I are EBV positive latency I BL cell lines and Mutu III is a cell line derived from Mutu I cells  
672 that drifted in culture to express all EBV latent proteins (latency III) (47). All LCLs also  
673 display the latency III pattern of EBV gene expression and were described previously (48);  
674 IB4, spLCL, LCL3, C2 + Obaji, JAC-B2, BM + Akata LCLs are infected with type 1 EBV  
675 and C2 + BL16, WEI-B1, Jijoye and AFB1 LCLs are infected with type 2 EBV. The ER-EB  
676 2.5 LCL, expressing a conditionally active oestrogen receptor (ER)-EBNA2 fusion protein,  
677 was provided by Prof B. Kempkes and was cultured in the presence of β-estradiol (37). The  
678 Daudi:pHEBo-MT:E2T1, Daudi:pHEBo-MT:E2T2 and Daudi:pHEBo-MT:E2T2 S442D cell  
679 lines were generated and cultured as described previously (21). B cell infection samples were  
680 described previously (49).

681

### 682 *Plasmids*

683 Constructs expressing N-terminal 6 x histidine tagged EBNA2 polypeptides were generated  
684 using the Sequence and Ligation Independent Cloning (SLIC) technique using type 1 EBNA2  
685 (B95-8), type 2 EBNA2 (AG876) and type 2 EBNA2 SD (serine to aspartate at position 409)  
686 pSG5 expression plasmids as templates to amplify the regions of interest. DNA was PCR  
687 amplified using primers containing 20-30 bp of additional sequence from the regions 5' and  
688 3' to the multiple cloning site of pET47b+. pET47b+ was digested using SmaI and HindIII  
689 and the PCR product and double-digested vector were then partially digested using the 3' to

690 5' exonuclease activity of T4 DNA Polymerase in the absence of dNTPs to generate long  
691 complementary 5' overhangs. The PCR products and pET47b+ were then annealed on ice.  
692 The ligated DNA fragments obtained contain four nicks that are repaired by *E. coli* after  
693 transformation. For type 1 EBNA2, constructs encoded amino acids 381-445 or 381-455 to  
694 generate pET47b+ T1 EBNA2<sub>381-445</sub> and pET47b+ T1 EBNA2<sub>381-455</sub>. Type 2 EBNA2  
695 constructs encoded amino acids 348-412 or 348-422 to generate pET47b+ T2 EBNA2<sub>348-412</sub>,  
696 pET47b+ T2 EBNA2<sub>348-422</sub> and pET47b+ T2 EBNA2<sub>348-422</sub> SD.  
697 The BS69 CC-MYND domain (amino acids 480-602) was amplified from pCI-BS69  
698 containing the full length human BS69 sequence (gift from Dr Stéphane Ansieau) and cloned  
699 using SLIC into the SmaI and HindIII sites of pET49b+ to generate a construct expressing an  
700 N-terminal GST-6x Histidine tag BS69<sub>CC-MYND</sub> fusion protein.

701 To create GAL4-DNA-binding domain-EBNA2 TAD fusion protein expressing constructs  
702 pBlueScript plasmids carrying EBNA2 sequences were used as the template to PCR amplify  
703 the type 1 EBNA2 TAD (amino acids 426-463) and the type 2 EBNA2 TAD (amino acids  
704 334-487) using *Taq* DNA polymerase. Primers contained *Bam*HI or *Not*I restriction sites at  
705 their 5' ends. PCR products were first cloned into pCR2.1 using the TA cloning kit  
706 (Invitrogen) according to the manufacturer's instructions. The pCR2.1 vector carrying the  
707 cloned PCR product was then digested with *Bam*HI and *Not*I and the EBNA2 TAD fragment  
708 then cloned into the *Bam*HI and *Not*I sites of pcDNA3.1-GAL4-DBD.

709

#### 710 *Site-directed mutagenesis*

711 Reverse PCR with the Q5<sup>®</sup> Site-Directed Mutagenesis kit (NEB) was used to introduce  
712 mutations into BS69 binding motif 3 in the pET47b+ T2 EBNA2<sub>348-422</sub> construct. This  
713 resulted in a change from PTLEP to ATAEA and generated pET47b+ T2 EBNA2<sub>348-422</sub> motif

714 3 mt. The same primers were used to mutate motif 3 in the context of the SD mutation to  
715 generate pET47b+ T2 EBNA2<sub>348-422</sub> SD + motif 3 mt.

716

#### 717 *Growth maintenance assay*

718 The EREB2.5 growth assay was performed as described previously (20). Briefly, 5 µg of  
719 OriP-p294 plasmids expressing type 1 EBNA2, type 2 EBNA2 or type 2 EBNA2 mutants  
720 were transfected into  $5 \times 10^6$  EREB 2.5 cells resuspended in 110 µl of buffer T using Neon  
721 transfection with 1 pulse of 1300 V for 30 msec. Following transfection, cell suspensions  
722 were added to 2 ml of media supplemented with 10% FBS and antibiotics but without β-  
723 oestradiol and incubated overnight in 12-well plates. The following day each transfected  
724 sample was made up to 10 mls with media and divided into 5 x 2 ml aliquots in a 12-well  
725 plate. Samples were harvested for cell counting and protein analysis at time points up to 4  
726 weeks.

727

#### 728 *Reporter assays*

729 Cells were diluted 1:3 in fresh culture medium one day before transfection.  $2 \times 10^6$  BJAB  
730 cells were used for each individual transfection. Cells were pelleted by centrifugation at 335g  
731 for 5 minutes at 4°C and washed twice with pre-warmed PBS. Cells were resuspended in 100  
732 µl of Neon resuspension solution R (Invitrogen). Cell suspensions were then mixed with  
733 plasmid DNA (2-12 µg in TE buffer). Cells were co-transfected with 300 ng of either type 1  
734 GAL4-DBD:EBNA2 (aa 334-487) or type 2 GAL4-DBD:EBNA2 (301-454) constructs, 500  
735 ng of pFRLuc (Agilent technologies), 10 ng of pRL-CMV (Promega) and 1 µg of BS69 (pCI-  
736 BS69) or BS69 ΔMYND (pCI-BS69-ΔMYND) expressing plasmids (gift from Dr Stéphane  
737 Ansieau). The DNA and cell mixture was transferred to a 100 µl Neon transfection pipette tip  
738 (Invitrogen). Cells were electroporated using Neon transfection protocol 14 (1200 V of pulse



739 voltage, 20 ms of pulse width and 2 pulse number) and then transferred into 2 ml of pre-  
740 warmed media in a 6-well plate and incubated at 37°C for 24 hr.

741 Cell pellets were then lysed using 100 µl of 1X Passive Lysis buffer (Promega). Two freeze-  
742 thaw cycles were performed to achieve efficient lysis (20 sec on dry ice and thawing at room  
743 temperature for 2 min). Cell debris was removed by centrifugation at 25,000g, for 1 min at  
744 4°C and the clear supernatant was then transferred to a fresh tube. 20 µl of lysate was assayed  
745 for firefly and Renilla luciferase activity using 20 µl of each dual luciferase assay kit reagent  
746 (Promega) and a microplate luminometer (LUMIstar Omega, BMG Labtech).

747

#### 748 *Recombinant protein production*

749 pGEX4T1-BS69 (kindly provided by Dr Stéphane Ansieau) was used to express a GST-BS69  
750 fusion protein containing amino acids 452-602 of BS69 encompassing the CC-MYND  
751 domain (numbered according to the canonical isoform) (34). pGEX4T1-RAB11B expressing  
752 GST-tagged RAB11B (gift from Prof Gill Elliott) was used to produce a negative control  
753 protein for the GST pull-down assays.

754 For production of BS69<sub>CC-MYND</sub> and EBNA2 polypeptides, the relevant plasmids were  
755 transformed into the Rosetta 2 (DE3) pLysS E. Coli strain and protein expression induced by  
756 adding 0.4 mM of isopropyl βD-1-thiogalactopyranoside (IPTG) to 3 litre cultures at an  
757 OD<sub>600nm</sub> of 0.6. The bacteria were then grown at 20°C overnight before harvesting for protein  
758 purification. Cell pellets from a 3 litre induced culture were lysed for 30 minutes on ice with  
759 constant stirring in 100 ml of lysis buffer (25 mM Tris-HCL pH 7.5, 500 mM NaCl, 5%  
760 Glycerol). The lysis buffer was supplemented with 0.25 mg/ml lysozyme, 2 mM MgCl<sub>2</sub>, 1  
761 mM TCEP (tris(2-carboxyethyl)phosphine), two protease-inhibitor complete tablets (Roche)  
762 and DNase and 0.2 mg/ml of DNase I. Lysates were then sonicated at 37% amplitude for 5  
763 minutes with 10 seconds pulses using a Vibra-cell sonicator (SONICS). The cell debris was

764 pelleted at 15000 rpm for 45 minutes at 4°C (Biofuge Stratos, Heraeus). Beads from 3 ml of  
765 HisPur™ Cobalt Resin slurry (Thermo Scientific) were added to the cleared lysate along with  
766 2 mM imidazole and the sample incubated for 1 hour and 30 minutes at 4°C with rolling.  
767 Samples were decanted into a centrifuge column (Thermo Scientific Pierce) and washed with  
768 buffer (25mM Tris-HCl, 500mM NaCl and 1mM TCEP, 2 mM of imidazole, pH 7.5). The  
769 protein was eluted from the beads using buffer containing increasing concentrations of  
770 imidazole (5 mM, 10 mM, 20 mM, 50 mM, 100 mM, 200 mM, 300 mM and 500 mM).  
771 Fraction samples were analysed by SDS-PAGE and the fractions containing recombinant  
772 protein were pooled and incubated with 3C protease (200 µl of 2 mg/ml) in the presence of 2  
773 mM DTT overnight at 4°C to cleave the Histidine tag. His-tag cleaved proteins were then  
774 separated from the 3C protease by passing the protein sample through a GSTrap HP column  
775 (Amersham) using a peristaltic pump to capture the GST-tagged 3C protease. Untagged  
776 recombinant proteins were then concentrated and injected into a HiLoad™ 16/600  
777 Superdex™ 75g Column (GE Healthcare) pre-equilibrated in 25 mM Tris-HCL, 200 mM  
778 NaCl, 1 mM TCEP, pH 7.5 purified at 0.5 ml/min. Protein fractions containing purified  
779 protein were then pooled, concentrated and stored at -80°C until required. Approximately 1  
780 mg of purified EBNA2 polypeptides or 4 mg of BS69<sub>CC-MYND</sub> was obtained from 1 litre of  
781 culture.

782

### 783 *Isothermal titration calorimetry*

784 Four commercially synthesized peptides (Peptide Synthetics) were used for ITC. These  
785 included BS69 binding motif 2 of type 1 EBNA2 (435-445) or type 2 EBNA2 (402-412) and  
786 putative BS69 binding motif 3 of type 1 EBNA2 (445-455) or type 2 EBNA2 (412-422).

787 Frozen protein was quickly thawed using running water and dialysed overnight at 4°C using  
788 Slide-A-Lyzer® MINI Dialysis Units (Thermo Scientific) against ITC buffer (20mM Tris-

789 HCl, 100mM NaCl and 1mM TCEP , pH 7.5). The next day, protein samples were  
790 centrifuged at 13000 rpm for 10 minutes at 4°C and the concentration was determined by  
791 NanoDrop spectroscopy (NanoDrop Technologies) with their respective molecular weights  
792 and extinction coefficients. EBNA2 peptides (1mM) and polypeptides (type 1, 0.3 mM and  
793 type 2, 0.6 mM) were titrated against BS69<sub>CC-MYND</sub> (0.1mM) at 25°C using a MicroCal™  
794 iTC200 instrument (Malvern). For peptides, 13 x 3.0 µl injections were used for titration. For  
795 EBNA2 polypeptides 19 x 2.0 µl or 29 x 1.3 µl injections were used for titration. ITC data  
796 were corrected for non-specific heat and analysed using MicroCal Origin® 7.0. The  
797 experiments were performed in triplicate alongside a control experiment with no BS69<sub>CC-</sub>  
798 <sub>MYND</sub> (buffer only in the cell). All polypeptides were used within 24 hours of dialysis into  
799 ITC buffer.

800

#### 801 *Size Exclusion Chromatography*

802 An S200 10/300 GL gel filtration column (GE Healthcare) was equilibrated with buffer  
803 containing 20mM Tris-HCl, 100mM NaCl and 1mM TCEP, pH 7.5. Individual EBNA2 or  
804 BS69<sub>CC-MYND</sub> polypeptides or complexes were applied to the column and analysed at a flow  
805 rate of 0.5ml/min. The eluted fractions were then analysed by SDS-PAGE and Quick  
806 Coomassie staining.

807

#### 808 *Size Exclusion Chromatography-multi-angle light scattering*

809 EBNA2-BS69 complexes were prepared by pre-incubating proteins in a 1:3 molar ratio for at  
810 least 30 mins at 4°C. Purified samples (45 µl) at a concentration of 5 mg/ml were loaded onto  
811 a Shodex KW403-4F column at 25°C pre-equilibrated in 20 mM Tris-HCl, 100mM NaCl and  
812 1mM TCEP, pH 7.5. Elution fractions were monitored using a DAWN HELEOS II MALS  
813 detector followed by a refractive index detector Optilab T-rEX (Wyatt Technology).

814 Molecular masses of each individual peak were determined using ASTRA 6 software (Wyatt  
815 Technology). For normalization of the light scattering and data quality, BSA was used as a  
816 calibration standard.

### 817 *Small-angle X-ray scattering*

818 Synchrotron radiation X-ray scattering data from solutions of individual proteins or  
819 complexes prepared as for SEC-MALS were collected on beamline B21 at Diamond Light  
820 Source (Didcot, United Kingdom), with an inline HPLC system. X-ray scattering patterns  
821 were recorded on a Pilatus detector after injection of 45  $\mu$ l of protein sample (5-10 mg/ml) in  
822 a Superdex 200 3.2/300 column equilibrated in 20mM Tris-HCl, 100mM NaCl, 2% Sucrose  
823 and 1mM TCEP, pH 7.5. Samples were analysed at 20°C using a flow-rate of 0.25 ml/min.  
824 Initial data processing (background subtraction and radius of gyration  $R_g$  calculation) was  
825 performed using ScÅtter (v3.0 by Robert P. Rambo; Diamond Light Source). *Ab initio* beads  
826 model for the complex were prepared using DAMMIF (50). 23 independent dummy atom  
827 models were obtained by running the program in ‘slow’ mode. DAMAVER was then used to  
828 align and average the models (51). The *ab initio* generated beads models were refined using  
829 DAMMIN and compared to the experimental scattering data to derive  $\chi^2$  values (52). The  
830 goodness-of-fit  $\chi^2$  values for the docked structure compared to the experimental scattering  
831 data were determined with FoXS (53).

### 832 *GST pull-down assays*

833 Nuclear extracts were prepared from control or EBNA2 expressing Daudi cell lines. EBNA2  
834 expression in Daudi:pHEBo-MT:EBNA2 cells was induced with 5  $\mu$ M CdCl<sub>2</sub> for 24 hours.  
835 At least  $4 \times 10^7$  cells were then harvested and resuspended in 1 ml of buffer A (10 mM HEPES  
836 pH 7.9, 1.5 mM MgCl<sub>2</sub>, 10 mM KCl, 0.5 mM 1,4-dithiothreitol (DTT) (Sigma), 1 mM PMSF  
837 (Sigma) and 1x complete protease inhibitor cocktail (Roche)). Cells were pelleted by

838 centrifugation at 1000g for 5 min at 4°C and lysed in 100 µl of buffer A supplemented with  
839 0.1% (v/v) NP-40 and incubated on ice for 5 min. Cell lysates were centrifuged at 2700g for  
840 30 sec at 4°C and the nuclei resuspended in 50 µl of buffer B (20 mM HEPES pH 7.9, 420  
841 mM NaCl, 1.5 mM MgCl<sub>2</sub>, 0.2 mM EDTA, 1 mM PMSF, 25% (v/v) glycerol, 1 mM DTT  
842 and 1x complete protease inhibitor cocktail) at 4°C for 20 min with rotation. Samples were  
843 finally centrifuged at 11,600g for 10 min at 4°C and the supernatants/nuclear extracts were  
844 transferred to fresh eppendorf tubes and the protein concentration was determined before  
845 storage at -80°C.

846

847 Lysates containing GST-tagged BS69<sup>CC-MYND</sup> or GST-RAB11B were prepared from 100 ml  
848 cultures of E. Coli BL21 (DE3). Transformed cells were cultured at 30°C until they reached  
849 an OD<sub>600nm</sub> of 0.6 and protein expression was induced at 25°C with 0.5 mM IPTG for 3-4 h.  
850 Cells were pelleted at 2,800g for 20 min at 4°C and then resuspended in 10 ml of Lysis buffer  
851 (20 mM Tris-Cl pH 8.0, 150 mM NaCl and 1 mM DTT) supplemented with 120 µl of  
852 lysozyme (10 mg/ml) and lysates incubated on ice for 20 min. Lysates were sonicated at high  
853 speed for 3 x 15 sec pulses in ice water using an Ultrasonic XL2020 Processor (Heat  
854 Systems) and cell debris pelleted at 17,900g for 30 min at 4°C. Lysates were stored at -80°C  
855 until required.

856

857 For pull-down assays, 50 µl of 50% Glutathione-Sepharose 4B Bead slurry (GE Healthcare)  
858 was washed three times in ice-cold binding buffer (20 mM Tris-Cl pH 8.0, 150 mM NaCl, 1  
859 mM DTT and 0.1 mg/ml BSA). Beads were pelleted by centrifugation at 25,000g for 1 min  
860 and 100 µl of bacterial lysate containing the GST-tagged protein was incubated with the  
861 washed beads for 1 h at 4°C with rotation. Glutathione-Sepharose Beads bound to the GST-

862 tagged protein were then washed with ice-cold binding buffer six times and pelleted by  
863 centrifugation at 25,000g for 1 min. Loaded GST- BS69<sup>CC-MYND</sup> beads were then incubated  
864 with nuclear extracts containing EBNA2 at 4°C for different times (5, 10 and 30 minutes).  
865 Loaded GST-RAB11B beads were incubated with lysates for 30 minutes. Beads were then  
866 washed six times with ice-cold binding buffer and pelleted by centrifugation at 25,000g for 1  
867 min. Beads were then resuspended in 25 µl of 2x SDS sample buffer (120 mM Tris-Cl pH  
868 6.8, 4% (w/v) SDS, 2% (v/v) β-mercaptoethanol, 20% (v/v) glycerol and 0.01% (w/v)  
869 bromophenol blue) and incubated at 95°C for 5 min and analysed for EBNA2 levels by SDS-  
870 PAGE and Western blotting.

871

#### 872 *SDS-PAGE and Western blotting*

873 SDS-PAGE and Western blotting was carried out as described previously (54, 55) using the  
874 anti-EBNA2 monoclonal antibody PE2 (gift from Prof M. Rowe) anti-actin 1/5000 (A-2066,  
875 Sigma) and anti-BS69 1/1000 (ab190890, Abcam). Western blot visualisation and signal  
876 quantification was carried out using a Li-COR Imager. Gels were stained using Quick  
877 Coomassie stain (Generon Ltd).

878

#### 879 *PCR and QPCR*

880 RNA was extracted from cells using Trireagent (Sigma), further purified using the RNeasy  
881 kit (Promega) and cDNA synthesised using random primers and the ImProm II reverse  
882 transcription kit (Promega). Standard PCR reactions were performed with Phusion DNA  
883 polymerase (New England Biolabs) using the relevant BS69 primers listed in Supplementary  
884 Table S1. Quantitative PCR was performed in duplicate using the standard curve absolute  
885 quantification method on an Applied Biosystems 7500 real-time PCR machine as described

886 previously (56) using the relevant primers listed in Supplementary Table S1. The efficiency  
887 of all primers was determined prior to use and in each experiment and all had amplification  
888 efficiencies within the recommended range (90–105%).

889

## 890 **Data Availability**

891 SAXS data have been deposited in the small angle scattering biological data bank (SASBDB)  
892 ([www.sasbdb.org](http://www.sasbdb.org)) under accession numbers SASDEF6, SASDEG6, SASDEH6, SASDEJ6,  
893 SASDEK6;

894 <https://www.sasbdb.org/data/SASDEF6/5llm1wasc4/>

895 <https://www.sasbdb.org/data/SASDEG6/4yff1ro01u/>

896 <https://www.sasbdb.org/data/SASDEH6/tpia09j2m0/>

897 <https://www.sasbdb.org/data/SASDEJ6/werm0avk55/>

898 <https://www.sasbdb.org/data/SASDEK6/07t9uflv7k/>

899

## 900 **Acknowledgements**

901 We thank Dr Stéphane Ansieau and Prof Gill Elliott for providing plasmids. We thank  
902 Diamond Light Source for beamtime (proposal mx14891) and the staff of beamline B21 for  
903 assistance with data collection.

904

905

906

907 **Figure Legends**

908 **Figure 1. Isothermal titration calorimetry analysis of the interaction of type 1 and type**

909 **2 EBNA2 peptides and polypeptides containing BS69 binding motif 2 with BS69<sub>CC-MYND</sub>.**

910 (A) Amino acid sequence of the regions of type 1 (B95-8) and type 2 (AG876) EBNA2  
911 containing BS69 binding motifs 1 and 2 (underlined). Asterisks show the positions of the P, L  
912 and P amino acids in the PXLXP binding motif. Aspartate 442 in type 1 EBNA2 and the  
913 corresponding serine 409 in type 2 EBNA2 adjacent to motif 2 are shown in red. (B)  
914 Isothermal titration calorimetry (ITC) analysis of type 1 EBNA2 motif 2 peptide binding to  
915 BS69<sub>CC-MYND</sub>. The upper panel shows heat peak data as Differential Power (DP) versus time  
916 and the lower panel shows  $\Delta H$  (derived from integration of the heat peak intensities) plotted  
917 against the BS69<sub>CC-MYND</sub>/EBNA2 molar ratio (based on monomer concentrations). Titrations  
918 were performed using a series of 13 2.0  $\mu$ l injections of 1 mM EBNA2 peptide and 0.1 mM  
919 BS69<sub>CC-MYND</sub> in the cell. The solid line shows the best fit using a one-site (one event) binding  
920 model with the n value fixed to 1. The dissociation constant ( $K_D$ ) displayed shows the mean  $\pm$   
921 standard deviation obtained from 3 independent experiments (C) ITC analysis of the binding  
922 of the type 1 EBNA2 polypeptide T1 EBNA2<sub>381-445</sub> (0.6 mM) to BS69<sub>CC-MYND</sub> using 19 2.0  $\mu$ l  
923 injections of 0.1 mM EBNA2 polypeptide. The n value indicates the stoichiometry of  
924 BS69<sub>CC-MYND</sub>/EBNA2 binding calculated for monomeric proteins and shows the mean  $\pm$   
925 standard deviation from 3 independent experiments. (D) ITC analysis of the binding of the  
926 type 2 EBNA2 polypeptide T2 EBNA2<sub>348-412</sub> (0.3 mM) to BS69<sub>CC-MYND</sub> (0.1 mM) as in C.

927

928

929 **Figure 2. Isothermal titration calorimetry analysis of the interaction of type 1 and type**

930 **2 EBNA2 peptides and polypeptides containing BS69 binding motif 3 with BS69<sub>CC-MYND</sub>.**



931 (A) Amino acid sequence of the regions of type 1 (B95-8) and type 2 (AG876) EBNA2  
932 containing BS69 binding motifs 1, 2 and 3 (underlined). Asterisks show the positions of the  
933 P, L and P amino acids in the PXLXP binding motif. (B) Isothermal titration calorimetry  
934 (ITC) analysis of type 1 EBNA2 motif 3 peptide binding to BS69<sub>CC-MYND</sub> (no binding was  
935 detected so the  $K_D$  could not be determined (n.d.)). (C) Isothermal titration calorimetry (ITC)  
936 analysis of type 2 EBNA2 motif 3 peptide binding to BS69<sub>CC-MYND</sub> using 19 injections of 2.0  
937  $\mu$ l EBNA2 peptide. Data are displayed and analysed as in Figure 1. (C) ITC analysis of the  
938 binding of type 2 EBNA2 motif 3 peptide binding to BS69<sub>CC-MYND</sub> as in B. (D) ITC analysis  
939 of the binding of the type 1 EBNA2 polypeptide EBNA2<sub>381-455</sub> to BS69<sub>CC-MYND</sub>. (E) ITC  
940 analysis of the binding of the type 2 EBNA2 polypeptide T2 EBNA2<sub>348-422</sub> to BS69<sub>CC-MYND</sub>.  
941 (F) ITC analysis of the binding of the type 2 EBNA2 polypeptide T2 EBNA2<sub>348-422</sub> with BS69  
942 binding motif 3 mutated from PTLEP to ATAEA.

943

944 **Figure 3. Solution state analysis of EBNA2 and BS69<sub>CC-MYND</sub> complexes.** (A) Size  
945 exclusion chromatography of individual type 1 and type 2 EBNA2 polypeptides, BS69<sub>CC-</sub>  
946 <sub>MYND</sub> and EBNA2-BS69<sub>CC-MYND</sub> complexes. Absorbance was normalized to the type2  
947 EBNA2-BS69 complex (highest absorbance) using UNICORN software. (B) Samples from  
948 the indicated fractions were analysed by SDS-PAGE followed by Coomassie staining.

949

950 **Figure 4. Solution structure of EBNA2-BS69<sub>CC-MYND</sub> complexes determined by SAXS.**  
951 (A) SAXS scattering data for type 1 EBNA2<sub>381-455</sub>-BS69<sub>CC-MYND</sub> (black dots) fitted to the *ab*  
952 *initio* DAMMIN dummy atom model (red line). SAXS scattering data fitted to the docked  
953 structural complex shown in B (green) with the  $\chi^2$  determined by FoXS. Plots show relative  
954 log intensity vs scattering vector ( $q$ ). (B) Solution structure of type 1 EBNA2<sub>381-455</sub>-BS69<sub>CC-</sub>

955 MYND. The SAXS envelopes (grey mesh) were generated by averaging 23 *ab-initio* models  
956 using the DAMMIF programme. The crystal structures of two BS69<sub>CC-MYND</sub> dimers (PDB ID:  
957 5HDA) are shown in cyan and were manually docked into the SAXS envelope along with the  
958 *ab-initio* dummy atom SAXS solution structures of two type 1 EBNA2<sub>381-455</sub> polypeptides  
959 (salmon). The maximum dimension ( $D_{\max}$ ) and volume were calculated using ScÅtter. (C)  
960 SAXS scattering data for type 2 EBNA2<sub>348-422</sub>-BS69<sub>CC-MYND</sub> (black dots) fitted to the *ab initio*  
961 DAMMIN dummy atom model (red line). SAXS scattering data fitted to the docked  
962 structural complex shown in D (green) with the  $\chi^2$  determined by FoXS. (D) Solution  
963 structure of type 2 EBNA2<sub>348-422</sub>-BS69<sub>CC-MYND</sub> obtained as described in (B). The crystal  
964 structures of three BS69<sub>CC-MYND</sub> dimers (PDB ID: 5HDA) are shown in cyan and were  
965 manually docked into the SAXS envelope along with the *ab-initio* dummy atom SAXS  
966 solution structures of two type 2 EBNA2<sub>348-422</sub> polypeptides (orange).

967

968 **Figure 5. Isothermal titration calorimetry analysis of the interaction of type 1 and type 2**  
969 **EBNA2 polypeptides with BS69<sub>CC-MYND</sub> using an increased number of injections.** (A)  
970 ITC analysis of the binding of the type 1 EBNA2 polypeptide EBNA2<sub>381-455</sub> to BS69<sub>CC-MYND</sub>.  
971 Titrations were performed using a series of 29 injections of 1.3  $\mu$ l 0.3 mM EBNA2  
972 polypeptide and 0.1 mM BS69<sub>CC-MYND</sub> in the cell. The solid line shows the best fit using a  
973 two-site (two event) binding model. The mean dissociation constant ( $K_D$ )  $\pm$  standard  
974 deviation from 3 independent experiments is shown for each binding event. (B) ITC analysis  
975 of the binding of the type 2 EBNA2 polypeptide T2 EBNA2<sub>348-422</sub> to BS69<sub>CC-MYND</sub> using 29  
976 injections and fitting using a two-site (two event) binding model as in A. (C) ITC analysis of  
977 the binding of the type 2 EBNA2 polypeptide T2 EBNA2<sub>348-422</sub> SD containing the serine 412  
978 to aspartate mutation using 29 injections and fitting using a two-site (two event) binding  
979 model. (D) ITC analysis of the binding of the type 2 EBNA2 polypeptide T2 EBNA2<sub>348-422</sub>

980 with BS69 binding motif 3 mutated from PTLEP to ATAEA using 29 injections and fitting  
981 using a two-site (two event) binding model.

982 **Figure 6.** GST pulldown assay using GST-BS69<sub>CC-MYND</sub> and lysates from B cell lines  
983 expressing type 1 and type 2 EBNA2. Nuclear extracts of Daudi:pHEBo-MT:EBNA-2 cells  
984 expressing type 1 (T1), type 2 (T2) or type 2 SD EBNA2 proteins were incubated for 5, 15 or  
985 30 min at 4°C with glutathione beads which had been loaded with bacterial lysates expressing  
986 the GST- BS69<sub>CC-MYND</sub>. GST-RAB11B was used as a negative control and was incubated for  
987 30 min with the nuclear extracts. Following washing, beads were resuspended in protein  
988 sample buffer and analysed by SDS-PAGE and Western blotting for EBNA2 using the PE2  
989 anti-EBNA2 antibody. The EBNA2 proteins expressed by these cell lines display almost the  
990 same size (72 kD) since the number of polyproline residues had been equalised in all the  
991 EBNA2 alleles.

992

993 **Figure 7. LCL growth maintenance assay using type 2 EBNA2 mutants.** (A) ER-EB 2.5  
994 cells conditionally expressing an estrogen receptor type 1 EBNA2 fusion protein were  
995 cultured in medium containing  $\beta$ -estradiol prior to resuspension in medium without  $\beta$ -  
996 estradiol. Cells were transfected with OriP-based plasmids (p294) expressing full length type  
997 1 or type 2 EBNA2 or the type 2 SD, motif 3 or SD and motif 3 mutant EBNA2 proteins and  
998 cultured in medium without  $\beta$ -estradiol. Live cells (that excluded Trypan Blue) were counted  
999 1, 2, 3 and 4 weeks post-transfection. Data from a representative experiment of 4 independent  
1000 repeats is shown. Error bars show the mean  $\pm$  standard deviation of duplicate cell counts for  
1001 each sample. (B) Western blot analysis of EBNA2 expression in protein extracts from the  
1002 transfected EREB2.5 cells. Cells were harvested 2 days after transfection. EBNA2 was  
1003 detected using the PE2 monoclonal antibody and blots were probed for actin as a loading  
1004 control.

1005 **Figure 8. Western blot analysis of BS69 expression in EBV infected B cells.** (A) Western  
1006 blot analysis of BS69 expression in the EBV negative BL cell line AK31 and type 1 and type  
1007 2 EBV immortalised LCLs (that display the latency III pattern of gene expression associated  
1008 with expression of all EBV latent proteins). BS69 was detected using an antibody that  
1009 recognises a sequence in the MYND domain encoded by exon 15 (ab190890). EBNA2 was  
1010 detected using the PE2 monoclonal antibody. Type 2 EBV has a lower molecular weight due  
1011 a difference in the number of proline repeat residues present. Blots were probed for actin as a  
1012 loading control. (B) Western blot analysis of BS69 expression in EBV negative (BJAB,  
1013 DG75, AK31) and EBV positive latency I (Akata and Mutu I) and latency III B cell lines  
1014 (Mutu III (BL) and IB4 (LCL) as in A. (C) Western blot analysis of BS69 expression on  
1015 primary B cell infection. UI indicates uninfected primary B cells. Samples were taken at the  
1016 indicated day post-infection and analysed as in A.

1017

1018 **Figure 9. PCR analysis of the BS69 isoforms expressed in EBV infected B cells.** (A)  
1019 Diagram of the four experimentally verified BS69 isoforms. The position of the start codon  
1020 (ATG) and stop codon (red asterisk) is indicated. Numbering of exons is *as per* the canonical  
1021 isoform (isoform 1). Exon lengths are not to scale. Exon 4 is shown in red, Exon 15 is shown  
1022 in green and exon 14 is shown in blue. The 3' part of exon 14 present in isoforms 3 and 4 is  
1023 shown in blue hatched lines. A sequence within exon 15 is recognised by the antibody  
1024 (ab190890) used in Figure 8 as indicated on the diagram. Approximate locations of primers  
1025 used for conventional PCR and QPCR are indicated by black and red arrows respectively. (B)  
1026 Agarose gel analysis of PCR products generated using primers located in specific BS69  
1027 exons. The upper panel shows the PCR products amplified from cDNA samples from type 1  
1028 and type 2 LCLs and the primary infection samples shown in C using a forward primer  
1029 located in exon 3 and a reverse primer located in exon 13. Transcripts containing exon 4

1030 (isoform 1 and 3) will generate a 1139 bp product and those lacking exon 4 (isoforms 2 and  
1031 4) will produce a 977 bp product. The lower panel shows PCR carried out using the exon 3  
1032 forward primer and a reverse primer in the 3' region of exon 14 that is uniquely present in  
1033 differentially spliced BS69 transcripts lacking exon 15 (isoforms 3 and 4). Transcripts  
1034 containing exon 4 and lacking exon 15 (isoform 3) will generate a 1578 bp product and those  
1035 lacking exon 4 and exon 15 will produce a 1416 bp product (isoform 4). (C) QPCR analysis  
1036 of cDNA from a panel of EBV negative and positive B cell lines and primary EBV infections  
1037 using primers that amplify across the exon 14 and exon 15 junction. For EBV infections,  
1038 samples from two different experiments (#1 and #2) were used. Primary B cells (uninfected,  
1039 UI) were infected with EBV and samples harvested after 2 days (+ EBV). Results show the  
1040 mean  $\pm$  standard deviation of QPCR replicates from a representative experiment. BS69  
1041 relative quantities were normalized to  $\beta$ 2 microglobulin. (D) QPCR analysis as in (C) using  
1042 primers within exon 14. The reverse primer is located in the 3' part of exon 14 only present in  
1043 BS69 isoform 3 and 4.

1044

1045 **Figure 10. Expression of a dominant negative form of BS69 increases EBNA2**  
1046 **transactivation.** Transactivation assays in BJAB cells using EBNA2-GAL4-DNA binding  
1047 domain fusion proteins and a GAL4 reporter plasmid. Cells were cotransfected with 300 ng  
1048 of either type 1 GAL4-DBD:EBNA2 (aa 334-487) or type 2 GAL4-DBD:EBNA2 (301-454)  
1049 constructs, 500 ng of pFRLuc (Gal4 firefly luciferase reporter), 10 ng of pRL-CMV and 1  $\mu$ g  
1050 of BS69 (pCI-BS69) or BS69  $\Delta$ MYND (pCI-BS69- $\Delta$ MYND) expressing plasmids. For each  
1051 sample, firefly luciferase values were normalised for transfection efficiency using Renilla  
1052 luciferase values. Results are presented as luciferase activity relative to the pFR-Luc reporter  
1053 plasmid plus empty vector (pcDNA3.1-GAL4-DBD). BS69  $\Delta$ MYND was also transfected in

1054 the absence of EBNA2 expressing constructs. Results show the mean of two independent  
1055 experiments  $\pm$  standard deviation.

1056

1057 **Table 1.** Size exclusion chromatography and multiangle light scattering (MALS)  
1058 determination of the molecular weight of individual type 1 and type 2 EBNA2 polypeptides,  
1059 BS69<sub>CC-MYND</sub> and EBNA2-BS69 complexes. Theoretical and experimentally determined  
1060 molecular weights are shown. For EBNA2-BS69 complexes, the theoretical molecular  
1061 weights of complexes containing different numbers of EBNA2 and BS69 molecules are  
1062 shown in parentheses. The most likely solution state based the experimentally determined  
1063 molecular weight is indicated for each sample.

1064

#### 1065 **Supporting Information Legends**

1066 **Supplementary Figure S1.** Normalised (dimensionless) Kratky plots generated using  
1067 ScÅtter (v3.0 by Robert P. Rambo; Diamond Light Source).  $I(q)/I(0) \cdot (q \cdot R_g)^2$  vs  $q \cdot R_g$ .  
1068 Scattering intensity  $I(q)$ , scattering vector ( $q$ ), radius of gyration ( $R_g$ ).

1069

1070 **Supplementary Figure S2.** Solution structures of BS69<sub>CC-MYND</sub> and type 1 and type 2  
1071 EBNA2 polypeptides determined by SAXS. (A-C) The SAXS envelopes (grey mesh) were  
1072 generated by averaging 20 *ab-initio* models using the DAMMIF programme and further  
1073 refined with DAMMIN to produce refined dummy atom models (magenta mesh). The  
1074 maximum dimension ( $D_{max}$ ) and volume were calculated using the ScÅtter programme. In  
1075 (A) the BS69<sub>CC-MYND</sub> dimer structure (cyan; PDB ID: 5HDA) was manually docked into the  
1076 envelope. (D-F) SAXS scattering data (black dots) fitted to the *ab initio* DAMMIN dummy  
1077 atom (red line).  $\chi^2$  values for fitting are shown.

1078

1079 **Supplementary Figure S3.** Alternative models and their respective goodness-of-fit to the  
1080 experimental SAXS data. (A) One BS69<sub>CC-MYND</sub> dimer (cyan; PDB ID: 5HDA) and the *ab*  
1081 *initio* model of one type 1 EBNA2<sub>381-455</sub> polypeptide (salmon) were manually docked into the  
1082 *ab initio* envelope (grey mesh) of the type 1 EBNA2 BS69 complex. (B) SAXS scattering  
1083 data were fitted to the docked structural complex shown in A and gave a  $\chi^2$  of 13.33 using  
1084 FoXS. Graphs show relative log intensity vs scattering vector (q) (upper panel) and the  
1085 deviation (residual) of the model from the experimental data (lower panel). The hydration  
1086 parameter ( $C_2$ ) was fixed to 0 to prevent the hydration shell increasing to beyond the  
1087 maximum limit of 4 to attempt to fit the structure into the envelope. (C) The structural model  
1088 shown in Figure 4C (two BS69<sub>CC-MYND</sub> dimers and two type 1 EBNA2<sub>381-455</sub> polypeptides)  
1089 was refitted to the SAXS envelope using FoXS with the  $C_2$  value set to 0 for comparison.  
1090 This gave a similar  $\chi^2$  (2.59) to that shown in Figure 4A indicating a much better fit to the  
1091 scattering data. (D) Two BS69<sub>CC-MYND</sub>BS69<sub>CC-MYND</sub> dimers (cyan; PDB ID: 5HDA) and the  
1092 *ab initio* model of one type 2 EBNA2<sub>348-422</sub> polypeptide (orange) were manually docked into the  
1093 *ab initio* envelope (grey mesh). (E) SAXS scattering data were fitted to the docked structural complex  
1094 shown in D and gave a  $\chi^2$  of 4.65 using FoXS. Graphs show relative log intensity vs scattering vector  
1095 (q) (upper panel) and the deviation (residual) of the model from the experimental data (lower panel).  
1096 The hydration parameter ( $C_2$ ) was fixed to 0 to prevent the hydration shell increasing to high levels to  
1097 attempt to fit the structure into the envelope. (E) The structural model shown in Figure 4D (three  
1098 BS69<sub>CC-MYND</sub> dimers and two type 2 EBNA2<sub>348-422</sub> polypeptides) was refitted to the SAXS envelope  
1099 using FoXS with the  $C_2$  value set to 0 for comparison. This gave a similar  $\chi^2$  (1.47) to that shown in  
1100 Figure 4B indicating a much better fit to the scattering data.

1101

1102 **Supplementary Table S1.** Primer sequences.

1103

1104 **Supplementary Table S2.** Data obtained from Isothermal calorimetry analysis of EBNA2  
1105 peptides and polypeptides binding to BS69<sub>CC-MYND</sub> (n.d. indicates binding not detected). Data  
1106 show the mean  $\pm$  standard deviation for three independent experiments. For peptides n values  
1107 were fixed to 1. Data from type 2 EBNA2 peptides and polypeptides are in shaded columns.

1108

1109 **Supplementary Table S3.** SAXS data for BS69 and EBNA2 polypeptides and complexes.

1110

1111

1112



## 1113 **References**

- 1114 1. Cohen JI, Wang F, Mannick J, Kieff E. Epstein-Barr virus nuclear protein 2 is a key  
1115 determinant of lymphocyte transformation. *Proc Natl Acad Sci U S A.* 1989  
1116 Dec;86(23):9558-62. PubMed PMID: 2556717.
- 1117 2. Kempkes B, Ling PD. EBNA2 and Its Coactivator EBNA-LP. *Curr Top Microbiol*  
1118 *Immunol.* 2015;391:35-59. PubMed PMID: 26428371.
- 1119 3. Glaser LV, Rieger S, Thumann S, Beer S, Kuklik-Roos C, Martin DE, et al. EBF1  
1120 binds to EBNA2 and promotes the assembly of EBNA2 chromatin complexes in B cells.  
1121 *PLoS Pathog.* 2017 Oct;13(10):e1006664. PubMed PMID: 28968461. Pubmed Central  
1122 PMCID: 5638620.
- 1123 4. West MJ. Chromatin reorganisation in Epstein-Barr virus-infected cells and its role in  
1124 cancer development. *Current opinion in virology.* 2017 Sep 11;26:149-55. PubMed PMID:  
1125 28910751.
- 1126 5. Zhao B, Zou J, Wang H, Johannsen E, Peng CW, Quackenbush J, et al. Epstein-Barr  
1127 virus exploits intrinsic B-lymphocyte transcription programs to achieve immortal cell growth.  
1128 *Proc Natl Acad Sci U S A.* 2011 Sep 6;108(36):14902-7. PubMed PMID: 21746931. Pubmed  
1129 Central PMCID: 3169132. Epub 2011/07/13. eng.
- 1130 6. Wood CD, Veenstra H, Khasnis S, Gunnell A, Webb HM, Shannon-Lowe C, et al.  
1131 MYC activation and BCL2L1 silencing by a tumour virus through the large-scale  
1132 reconfiguration of enhancer-promoter hubs. *eLife.* 2016 Aug 04;5. PubMed PMID:  
1133 27490482. Pubmed Central PMCID: 5005034.
- 1134 7. Wang L, Grossman SR, Kieff E. Epstein-Barr virus nuclear protein 2 interacts with  
1135 p300, CBP, and PCAF histone acetyltransferases in activation of the LMP1 promoter. *Proc*  
1136 *Natl Acad Sci U S A.* 2000 Jan 4;97(1):430-5. PubMed PMID: 10618435.
- 1137 8. Wu DY, Kalpana GV, Goff SP, Schubach WH. Epstein-Barr virus nuclear protein 2  
1138 (EBNA2) binds to a component of the human SNF-SWI complex, hSNF5/Ini1. *J Virol.* 1996  
1139 Sep;70(9):6020-8. PubMed PMID: 8709224.
- 1140 9. Wu DY, Krumm A, Schubach WH. Promoter-specific targeting of human SWI-SNF  
1141 complex by Epstein-Barr virus nuclear protein 2. *J Virol.* 2000 Oct;74(19):8893-903.  
1142 PubMed PMID: 10982332.
- 1143 10. Tong X, Drapkin R, Reinberg D, Kieff E. The 62- and 80-kDa subunits of  
1144 transcription factor IIIH mediate the interaction with Epstein-Barr virus nuclear protein 2.  
1145 *Proc Natl Acad Sci U S A.* 1995 Apr 11;92(8):3259-63. PubMed PMID: 7724549.
- 1146 11. Tong X, Drapkin R, Yalamanchili R, Mosialos G, Kieff E. The Epstein-Barr virus  
1147 nuclear protein 2 acidic domain forms a complex with a novel cellular coactivator that can  
1148 interact with TFIIE. *Mol Cell Biol.* 1995 Sep;15(9):4735-44. PubMed PMID: 7651391.
- 1149 12. Tong X, Wang F, Thut CJ, Kieff E. The Epstein-Barr virus nuclear protein 2 acidic  
1150 domain can interact with TFIIB, TAF40, and RPA70 but not with TATA-binding protein. *J*  
1151 *Virol.* 1995 Jan;69(1):585-8. PubMed PMID: 7983760.
- 1152 13. Cohen JI, Kieff E. An Epstein-Barr virus nuclear protein 2 domain essential for  
1153 transformation is a direct transcriptional activator. *J Virol.* 1991 Nov;65(11):5880-5. PubMed  
1154 PMID: 1656076.
- 1155 14. Sample J, Young L, Martin B, Chatman T, Kieff E, Rickinson A. Epstein-Barr virus  
1156 types 1 and 2 differ in their EBNA-3A, EBNA-3B, and EBNA-3C genes. *J Virol.* 1990  
1157 Sep;64(9):4084-92. PubMed PMID: 2166806.
- 1158 15. Dambaugh T, Hennessy K, Chamnankit L, Kieff E. U2 region of Epstein-Barr virus  
1159 DNA may encode Epstein-Barr nuclear antigen 2. *Proc Natl Acad Sci U S A.* 1984  
1160 Dec;81(23):7632-6. PubMed PMID: 6209719. Pubmed Central PMCID: 392202.

- 1161 16. Rowe M, Young LS, Cadwallader K, Petti L, Kieff E, Rickinson AB. Distinction  
1162 between Epstein-Barr virus type A (EBNA 2A) and type B (EBNA 2B) isolates extends to  
1163 the EBNA 3 family of nuclear proteins. *J Virol.* 1989 Mar;63(3):1031-9. PubMed PMID:  
1164 2536817. Pubmed Central PMCID: 247795.
- 1165 17. Palser AL, Grayson NE, White RE, Corton C, Correia S, Ba Abdullah MM, et al.  
1166 Genome diversity of Epstein-Barr virus from multiple tumor types and normal infection. *J*  
1167 *Virol.* 2015 May;89(10):5222-37. PubMed PMID: 25787276. Pubmed Central PMCID:  
1168 4442510.
- 1169 18. Correia S, Bridges R, Wegner F, Venturini C, Palser A, Middeldorp JM, et al.  
1170 Sequence variation of Epstein-Barr virus: viral types, geography, codon usage and diseases. *J*  
1171 *Virol.* 2018 Aug 15. PubMed PMID: 30111570.
- 1172 19. Rickinson AB, Young LS, Rowe M. Influence of the Epstein-Barr virus nuclear  
1173 antigen EBNA 2 on the growth phenotype of virus-transformed B cells. *J Virol.* 1987  
1174 May;61(5):1310-7. PubMed PMID: 3033261. Pubmed Central PMCID: 254104.
- 1175 20. Cancian L, Bosshard R, Lucchesi W, Karstegl CE, Farrell PJ. C-terminal region of  
1176 EBNA-2 determines the superior transforming ability of type 1 Epstein-Barr virus by  
1177 enhanced gene regulation of LMP-1 and CXCR7. *PLoS Pathog.* 2011 Jul;7(7):e1002164.  
1178 PubMed PMID: 21857817. Pubmed Central PMCID: 3145799.
- 1179 21. Tzellos S, Correia PB, Karstegl CE, Cancian L, Cano-Flanagan J, McClellan MJ, et  
1180 al. A Single Amino Acid in EBNA-2 Determines Superior B Lymphoblastoid Cell Line  
1181 Growth Maintenance by Epstein-Barr Virus Type 1 EBNA-2. *J Virol.* 2014 Aug  
1182 15;88(16):8743-53. PubMed PMID: 24850736.
- 1183 22. Lucchesi W, Brady G, Dittrich-Breiholz O, Kracht M, Russ R, Farrell PJ. Differential  
1184 gene regulation by Epstein-Barr virus type 1 and type 2 EBNA2. *J Virol.* 2008  
1185 Aug;82(15):7456-66. PubMed PMID: 18480445. Pubmed Central PMCID: 2493322. Epub  
1186 2008/05/16. eng.
- 1187 23. Coleman CB, Daud, II, Ogolla SO, Ritchie JA, Smith NA, Sumba PO, et al. Epstein-  
1188 Barr Virus Type 2 Infects T Cells in Healthy Kenyan Children. *J Infect Dis.* 2017 Sep  
1189 15;216(6):670-7. PubMed PMID: 28934430. Pubmed Central PMCID: 5853903.
- 1190 24. Coleman CB, Wohlford EM, Smith NA, King CA, Ritchie JA, Baresel PC, et al.  
1191 Epstein-Barr virus type 2 latently infects T cells, inducing an atypical activation characterized  
1192 by expression of lymphotactic cytokines. *J Virol.* 2015 Feb;89(4):2301-12. PubMed PMID:  
1193 25505080. Pubmed Central PMCID: 4338898.
- 1194 25. Coleman CB, Lang J, Sweet LA, Smith NA, Freed BM, Pan Z, et al. Epstein-Barr  
1195 virus type-2 infects T-cells and induces B-cell lymphomagenesis in humanized mice. *J Virol.*  
1196 2018 Aug 8. PubMed PMID: 30089703.
- 1197 26. Wen H, Li Y, Xi Y, Jiang S, Stratton S, Peng D, et al. ZMYND11 links histone  
1198 H3.3K36me3 to transcription elongation and tumour suppression. *Nature.* 2014 Apr  
1199 10;508(7495):263-8. PubMed PMID: 24590075. Pubmed Central PMCID: 4142212.
- 1200 27. Guo R, Zheng L, Park JW, Lv R, Chen H, Jiao F, et al. BS69/ZMYND11 reads and  
1201 connects histone H3.3 lysine 36 trimethylation-decorated chromatin to regulated pre-mRNA  
1202 processing. *Mol Cell.* 2014 Oct 23;56(2):298-310. PubMed PMID: 25263594. Pubmed  
1203 Central PMCID: 4363072.
- 1204 28. de Rooij JD, van den Heuvel-Eibrink MM, Kollen WJ, Sonneveld E, Kaspers GJ,  
1205 Beverloo HB, et al. Recurrent translocation t(10;17)(p15;q21) in minimally differentiated  
1206 acute myeloid leukemia results in ZMYND11/MBTD1 fusion. *Genes, chromosomes &*  
1207 *cancer.* 2016 Mar;55(3):237-41. PubMed PMID: 26608508.
- 1208 29. Wang J, Qin S, Li F, Li S, Zhang W, Peng J, et al. Crystal structure of human BS69  
1209 Bromo-ZnF-PWWP reveals its role in H3K36me3 nucleosome binding. *Cell Res.* 2014  
1210 Jul;24(7):890-3. PubMed PMID: 24675531. Pubmed Central PMCID: 4085756.

- 1211 30. Ladendorff NE, Wu S, Lipsick JS. BS69, an adenovirus E1A-associated protein,  
1212 inhibits the transcriptional activity of c-Myb. *Oncogene*. 2001 Jan 4;20(1):125-32. PubMed  
1213 PMID: 11244510.
- 1214 31. Masselink H, Vastenhouw N, Bernardis R. B-myb rescues ras-induced premature  
1215 senescence, which requires its transactivation domain. *Cancer Lett*. 2001 Sep 28;171(1):87-  
1216 101. PubMed PMID: 11485831.
- 1217 32. Wei G, Schaffner AE, Baker KM, Mansky KC, Ostrowski MC. Ets-2 interacts with  
1218 co-repressor BS69 to repress target gene expression. *Anticancer research*. 2003 May-  
1219 Jun;23(3A):2173-8. PubMed PMID: 12894593.
- 1220 33. Velasco G, Grkovic S, Ansieau S. New insights into BS69 functions. *J Biol Chem*.  
1221 2006 Jun 16;281(24):16546-50. PubMed PMID: 16565076.
- 1222 34. Ansieau S, Leutz A. The conserved Mynd domain of BS69 binds cellular and  
1223 oncoviral proteins through a common PXLXP motif. *J Biol Chem*. 2002 Feb 15;277(7):4906-  
1224 10. PubMed PMID: 11733528.
- 1225 35. Harter MR, Liu CD, Shen CL, Gonzalez-Hurtado E, Zhang ZM, Xu M, et al.  
1226 BS69/ZMYND11 C-Terminal Domains Bind and Inhibit EBNA2. *PLoS Pathog*. 2016  
1227 Feb;12(2):e1005414. PubMed PMID: 26845565. Pubmed Central PMCID: 4742278.
- 1228 36. Friberg A, Thumann S, Hennig J, Zou P, Nossner E, Ling PD, et al. The EBNA-2 N-  
1229 Terminal Transactivation Domain Folds into a Dimeric Structure Required for Target Gene  
1230 Activation. *PLoS Pathog*. 2015 May;11(5):e1004910. PubMed PMID: 26024477. Pubmed  
1231 Central PMCID: 4449002.
- 1232 37. Kempkes B, Spitkovsky D, Jansen-Durr P, Ellwart JW, Kremmer E, Delecluse HJ, et  
1233 al. B-cell proliferation and induction of early G1-regulating proteins by Epstein-Barr virus  
1234 mutants conditional for EBNA2. *Embo J*. 1995 Jan 3;14(1):88-96. PubMed PMID: 7828599.
- 1235 38. Tsui S, Schubach WH. Epstein-Barr virus nuclear protein 2A forms oligomers in vitro  
1236 and in vivo through a region required for B-cell transformation. *J Virol*. 1994 Jul;68(7):4287-  
1237 94. PubMed PMID: 8207803. Pubmed Central PMCID: 236351.
- 1238 39. Harada S, Yalamanchili R, Kieff E. Epstein-Barr virus nuclear protein 2 has at least  
1239 two N-terminal domains that mediate self-association. *J Virol*. 2001 Mar;75(5):2482-7.  
1240 PubMed PMID: 11160754. Pubmed Central PMCID: 114834.
- 1241 40. Wan J, Zhang W, Wu L, Bai T, Zhang M, Lo KW, et al. BS69, a specific adaptor in  
1242 the latent membrane protein 1-mediated c-Jun N-terminal kinase pathway. *Mol Cell Biol*.  
1243 2006 Jan;26(2):448-56. PubMed PMID: 16382137. Pubmed Central PMCID: 1346911.
- 1244 41. Ikeda O, Sekine Y, Mizushima A, Oritani K, Yasui T, Fujimuro M, et al. BS69  
1245 negatively regulates the canonical NF-kappaB activation induced by Epstein-Barr virus-  
1246 derived LMP1. *FEBS Lett*. 2009 May 19;583(10):1567-74. PubMed PMID: 19379743.
- 1247 42. Ikeda O, Miyasaka Y, Yoshida R, Mizushima A, Oritani K, Sekine Y, et al. BS69  
1248 cooperates with TRAF3 in the regulation of Epstein-Barr virus-derived LMP1/CTAR1-  
1249 induced NF-kappaB activation. *FEBS Lett*. 2010 Mar 5;584(5):865-72. PubMed PMID:  
1250 20138174.
- 1251 43. Ben-Bassat H, Goldblum N, Mitrani S, Goldblum T, Yoffey JM, Cohen MM, et al.  
1252 Establishment in continuous culture of a new type of lymphocyte from a "Burkitt like"  
1253 malignant lymphoma (line D.G.-75). *Int J Cancer*. 1977 Jan;19(1):27-33. PubMed PMID:  
1254 188769. Epub 1977/01/01. eng.
- 1255 44. Jenkins PJ, Binne UK, Farrell PJ. Histone acetylation and reactivation of Epstein-Barr  
1256 virus from latency. *J Virol*. 2000 Jan;74(2):710-20. PubMed PMID: 10623733. Pubmed  
1257 Central PMCID: 111591. Epub 2000/01/07. eng.
- 1258 45. Klein G. Studies on Epstein-Barr Virus Genome and Ebv-Determined Nuclear  
1259 Antigen in Human Malignant Disease. *Cold Spring Harbor symposia on quantitative biology*.  
1260 1974;39:783-90. PubMed PMID: WOS:A1974AB46200012. English.

- 1261 46. Takada K. Cross-linking of cell surface immunoglobulins induces Epstein-Barr virus  
1262 in Burkitt lymphoma lines. *Int J Cancer*. 1984 Jan 15;33(1):27-32. PubMed PMID: 6319296.
- 1263 47. Gregory CD, Rowe M, Rickinson AB. Different Epstein-Barr virus-B cell interactions  
1264 in phenotypically distinct clones of a Burkitt's lymphoma cell line. *J Gen Virol*. 1990 Jul;71 (Pt 7):1481-95. PubMed PMID: 2165133. Epub 1990/07/01. eng.
- 1266 48. Spender LC, Lucchesi W, Bodelon G, Bilancio A, Karstegl CE, Asano T, et al. Cell  
1267 target genes of Epstein-Barr virus transcription factor EBNA-2: induction of the p53alpha  
1268 regulatory subunit of PI3-kinase and its role in survival of EREB2.5 cells. *J Gen Virol*. 2006  
1269 Oct;87(Pt 10):2859-67. PubMed PMID: 16963743. Epub 2006/09/12. eng.
- 1270 49. Brocard M, Khasnis S, Wood CD, Shannon-Lowe C, West MJ. Pumilio directs  
1271 deadenylation-associated translational repression of the cyclin-dependent kinase 1 activator  
1272 RGC-32. *Nucleic Acids Res*. 2018 Jan 27. PubMed PMID: 29385536. Pubmed Central  
1273 PMCID: 5909466.
- 1274 50. Franke D, Svergun DI. DAMMIF, a program for rapid ab-initio shape determination  
1275 in small-angle scattering. *J Appl Crystallogr*. 2009 Apr;42:342-6. PubMed PMID:  
1276 WOS:000264292800030. English.
- 1277 51. Volkov VV, Svergun DI. Uniqueness of ab initio shape determination in small-angle  
1278 scattering. *J Appl Crystallogr*. 2003 Jun;36:860-4. PubMed PMID: WOS:000182284400105.  
1279 English.
- 1280 52. Svergun DI. Restoring low resolution structure of biological macromolecules from  
1281 solution scattering using simulated annealing (vol 76, pg 2879, 1999). *Biophys J*. 1999  
1282 Nov;77(5):2896-. PubMed PMID: WOS:000083554900051. English.
- 1283 53. Schneidman-Duhovny D, Hammel M, Sali A. FoXS: a web server for rapid  
1284 computation and fitting of SAXS profiles. *Nucleic Acids Research*. 2010 Jul;38:W540-W4.  
1285 PubMed PMID: WOS:000284148900087. English.
- 1286 54. West MJ, Webb HM, Sinclair AJ, Woolfson DN. Biophysical and mutational analysis  
1287 of the putative bZIP domain of Epstein-Barr virus EBNA 3C. *J Virol*. 2004 Sep;78(17):9431-  
1288 45. PubMed PMID: 15308737.
- 1289 55. Bark-Jones SJ, Webb HM, West MJ. EBV EBNA 2 stimulates CDK9-dependent  
1290 transcription and RNA polymerase II phosphorylation on serine 5. *Oncogene*. 2006 Mar  
1291 16;25(12):1775-85. PubMed PMID: 16314842. Epub 2005/11/30. eng.
- 1292 56. McClellan MJ, Wood CD, Ojeniyi O, Cooper TJ, Kanhere A, Arvey A, et al.  
1293 Modulation of enhancer looping and differential gene targeting by Epstein-Barr virus  
1294 transcription factors directs cellular reprogramming. *PLoS Pathog*. 2013 Sep;9(9):e1003636.  
1295 PubMed PMID: 24068937. Pubmed Central PMCID: 3771879. Epub 2013/09/27. eng.
- 1296
- 1297

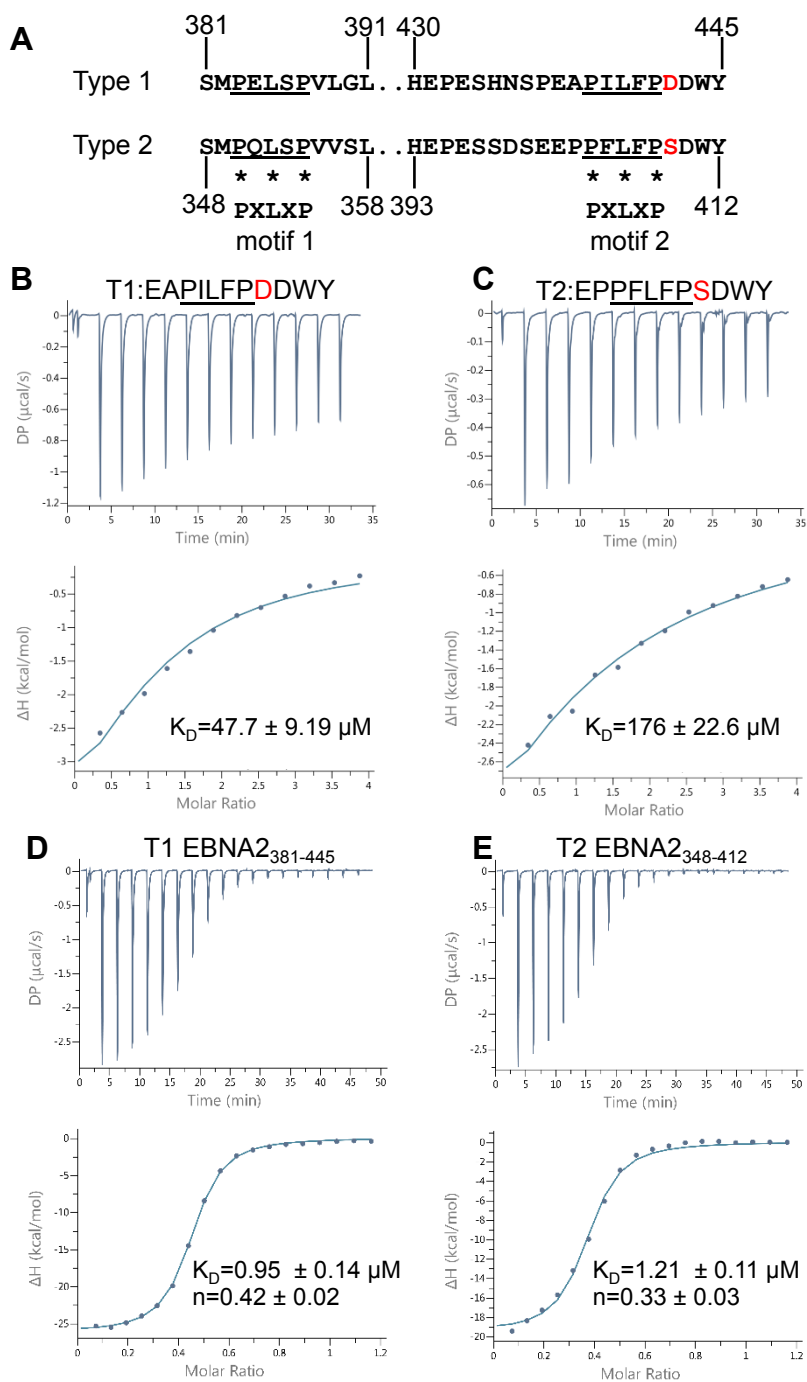

Figure 1





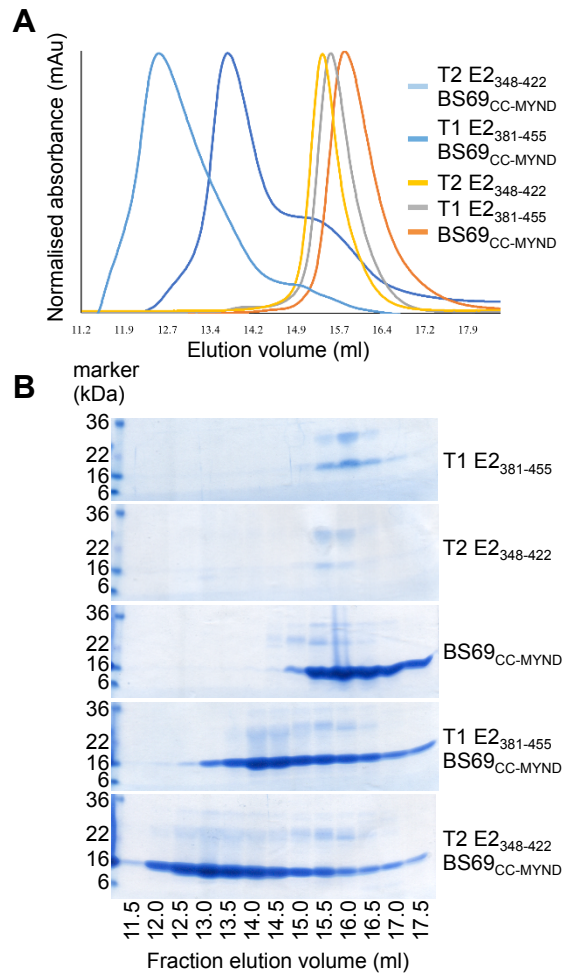

Figure 3

|                      | T1 E2 <sub>381-455</sub> | T2 E2 <sub>348-422</sub> | BS69 <sub>CC-MYND</sub>       | T1 E2 <sub>381-455</sub><br>BS69 <sub>CC-MYND</sub> | T2 E2 <sub>348-422</sub><br>BS69 <sub>CC-MYND</sub> |
|----------------------|--------------------------|--------------------------|-------------------------------|-----------------------------------------------------|-----------------------------------------------------|
| Theoretical MW (kDa) | 7.9<br>(monomer)         | 8.1<br>(monomer)         | 15.2<br>(monomer)             | 38.3 (1:2)<br>76.7 (2:4)<br>153.2 (4:8)             | 53.7 (1:3)<br>107.5 (2:6)<br>215 (4:12)             |
| SEC-MALS MW (kDa)    | 7.5                      | 8.2                      | 35.4                          | 62.3                                                | 135                                                 |
| Solution state       | T1 E2 monomer            | T2 E2 monomer            | BS69 <sub>CC-MYND</sub> dimer | 2 x T1 E2<br>2 x BS69 <sub>CC-MYND</sub> dimers     | 2 x T2 E2<br>3 x BS69 <sub>CC-MYND</sub> dimers     |

Table 1



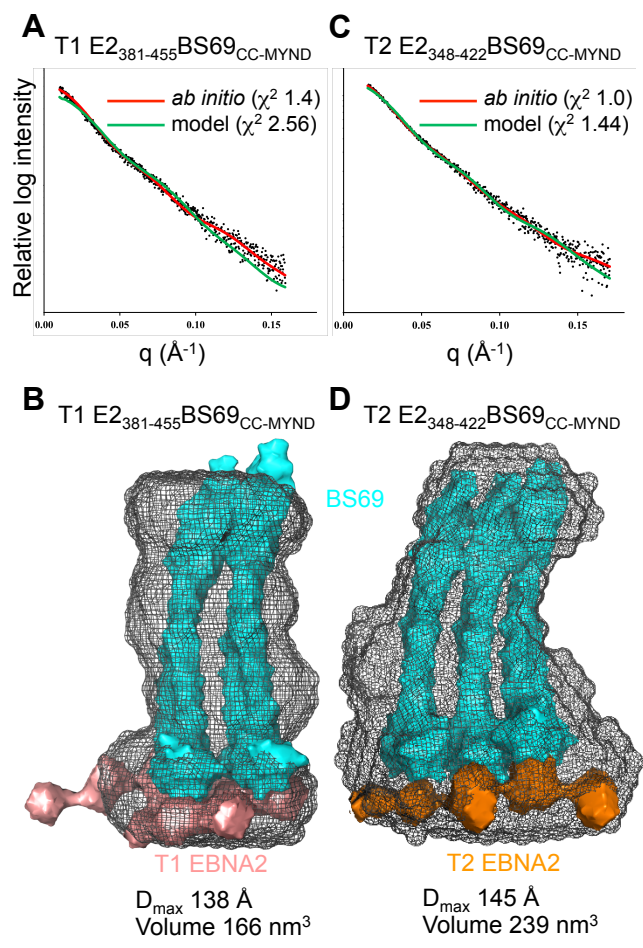

Figure 4

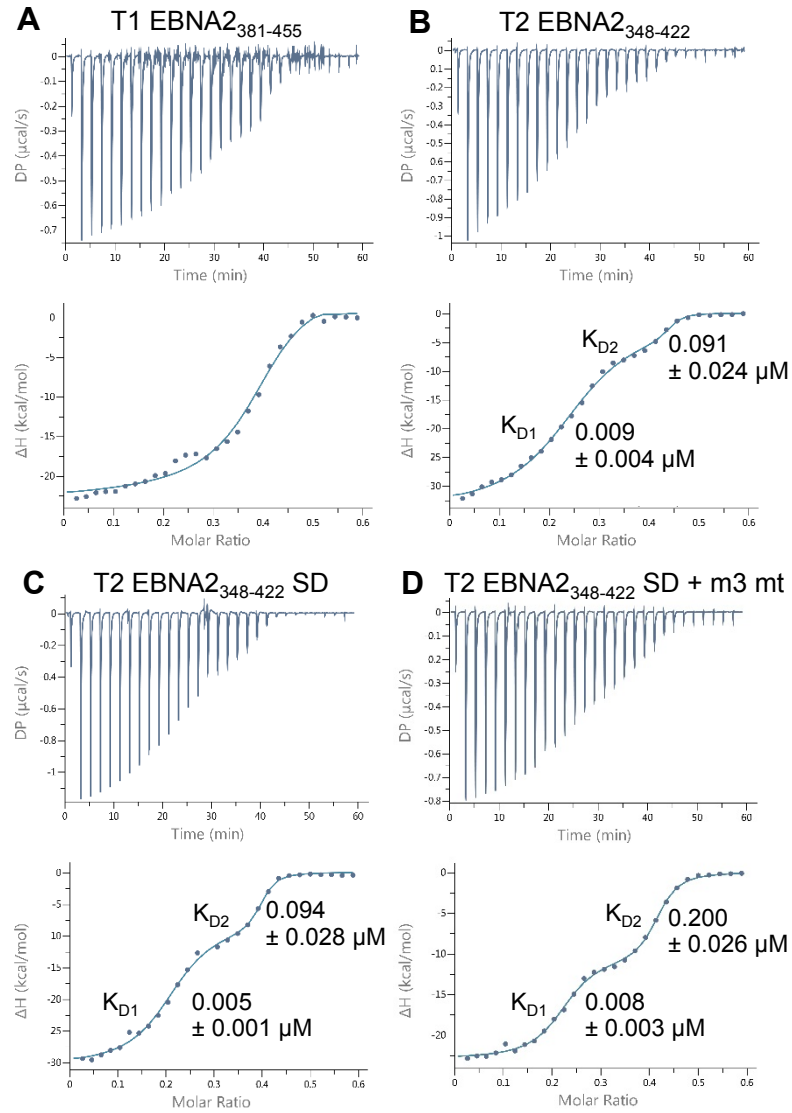

Figure 5

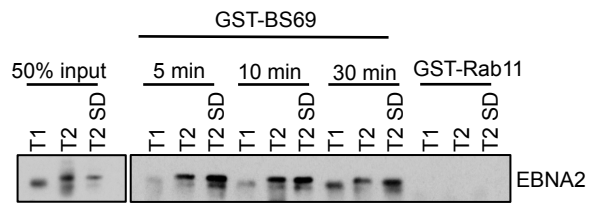

Figure 6

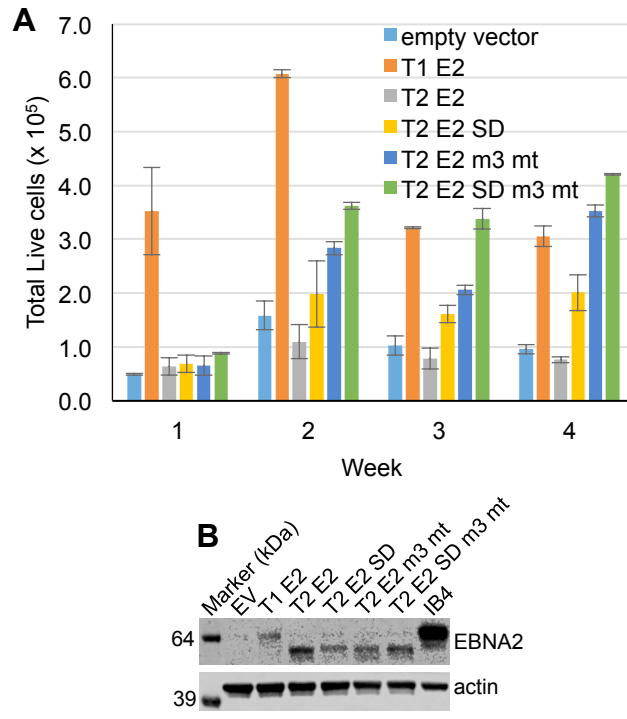

Figure 7

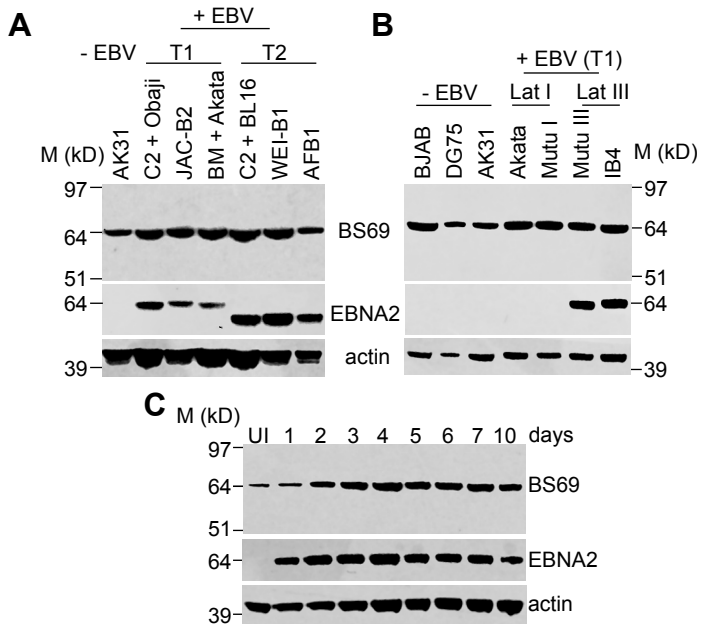

Figure 8

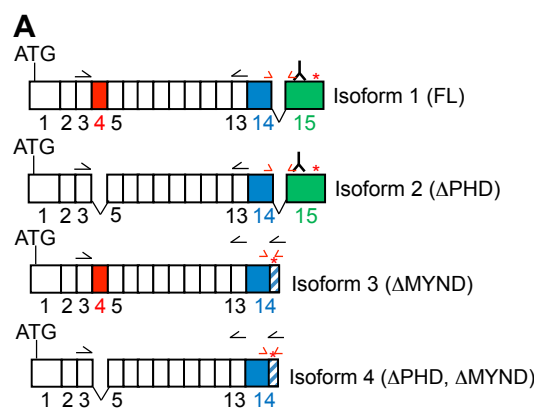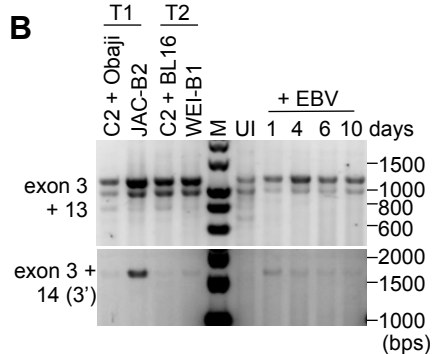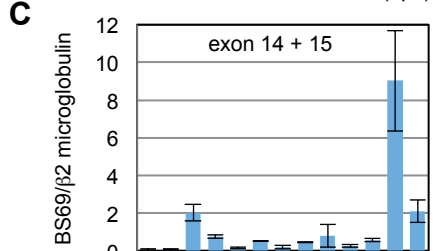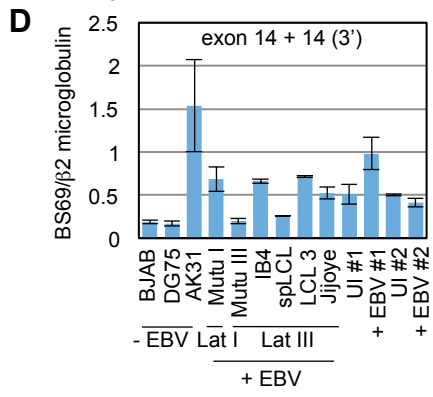

Figure 9

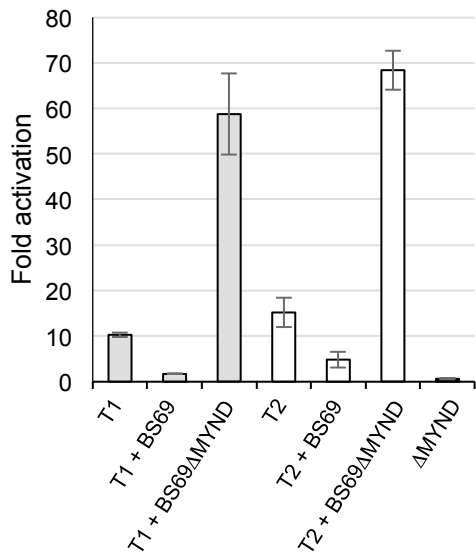

Figure 10
